# Supplementary material for: Pregnancy-specific transcriptional changes upon endotoxin exposure in mice
Source: publisher site journal article supplement (doi:10.1515/jpm-2020-0159), 2020-08-31
Supplement: Supplementary file 1 [file j_jpm-2020-0159_suppl_002.xlsx]

## Sheet: CERVIX_LPS_PregLPSvsPregCtl-Non
ENTREZ	SYMBOL	Name	Log Fold Change	Direction	Adjusted p-value
17312	Clec10a	C-type lectin domain family 10, member A	-1.38778	DOWNinPregLPSvsPregCtl	2.26124e-13
216864	Mgl2	macrophage galactose N-acetyl-galactosamine specific lectin 2	-0.996179	DOWNinPregLPSvsPregCtl	5.19254e-07
20758	Sprr2d	small proline-rich protein 2D	4.59494	UPinPregLPSvsPregCtl	5.19716e-06
20303	Ccl4	chemokine (C-C motif) ligand 4	1.38158	UPinPregLPSvsPregCtl	8.73711e-06
14605	Tsc22d3	TSC22 domain family, member 3	-1.67355	DOWNinPregLPSvsPregCtl	1.79283e-05
69457	Tmem45a2	transmembrane protein 45A2	1.64991	UPinPregLPSvsPregCtl	2.16661e-05
244886	AI118078	expressed sequence AI118078	1.84873	UPinPregLPSvsPregCtl	4.59718e-05
18573	Pde1a	phosphodiesterase 1A, calmodulin-dependent	-0.977236	DOWNinPregLPSvsPregCtl	4.59718e-05
18573	Pde1a	phosphodiesterase 1A, calmodulin-dependent	-0.745462	DOWNinPregLPSvsPregCtl	7.92629e-05
16666	Krt16	keratin 16	4.05838	UPinPregLPSvsPregCtl	8.30145e-05
22364	Vpreb3	pre-B lymphocyte gene 3	-1.43492	DOWNinPregLPSvsPregCtl	9.11478e-05
20303	Ccl4	chemokine (C-C motif) ligand 4	2.27066	UPinPregLPSvsPregCtl	9.24899e-05
26897	Acot1	acyl-CoA thioesterase 1	-2.46761	DOWNinPregLPSvsPregCtl	0.000182823
26897	Acot1	acyl-CoA thioesterase 1	-1.30733	DOWNinPregLPSvsPregCtl	0.000191522
93840	Vangl2	vang-like 2 (van gogh, Drosophila)	0.882996	UPinPregLPSvsPregCtl	0.000191522
238021	Fscn2	fascin homolog 2, actin-bundling protein, retinal (Strongylocentrotus purpuratus)	1.35391	UPinPregLPSvsPregCtl	0.000203738
12505	Cd44	CD44 antigen	1.28016	UPinPregLPSvsPregCtl	0.000232098
18573	Pde1a	phosphodiesterase 1A, calmodulin-dependent	-0.643887	DOWNinPregLPSvsPregCtl	0.000232098
381038	Parl	presenilin associated, rhomboid-like	0.62935	UPinPregLPSvsPregCtl	0.000276321
23962	Oasl2	2'-5' oligoadenylate synthetase-like 2	-0.944339	DOWNinPregLPSvsPregCtl	0.000276321
17752	Mt4	metallothionein 4	2.13989	UPinPregLPSvsPregCtl	0.000281016
56619	Clec4e	C-type lectin domain family 4, member e	1.00667	UPinPregLPSvsPregCtl	0.000281016
57355	BC051019	cDNA sequence BC051019	-1.52368	DOWNinPregLPSvsPregCtl	0.00030629
268490	Lsm12	LSM12 homolog (S. cerevisiae)	0.751164	UPinPregLPSvsPregCtl	0.000338191
12450	Ccng1	cyclin G1	-0.606899	DOWNinPregLPSvsPregCtl	0.000372136
29871	Scmh1	sex comb on midleg homolog 1	-0.749817	DOWNinPregLPSvsPregCtl	0.000520702
56494	Gosr2	golgi SNAP receptor complex member 2	0.965844	UPinPregLPSvsPregCtl	0.000640988
22422	Wnt7b	wingless-type MMTV integration site family, member 7B	1.74173	UPinPregLPSvsPregCtl	0.00103035
51801	Ramp1	receptor (calcitonin) activity modifying protein 1	-0.791667	DOWNinPregLPSvsPregCtl	0.00141015
13618	Ednrb	endothelin receptor type B	-1.66409	DOWNinPregLPSvsPregCtl	0.00141015
229900	Gbp7	guanylate binding protein 7	-1.02479	DOWNinPregLPSvsPregCtl	0.00142877
13618	Ednrb	endothelin receptor type B	-0.616266	DOWNinPregLPSvsPregCtl	0.00142877
107585	Dio3	deiodinase, iodothyronine type III	-2.37877	DOWNinPregLPSvsPregCtl	0.00165284
75083	Usp50	ubiquitin specific peptidase 50	-0.661867	DOWNinPregLPSvsPregCtl	0.00172187
102294	Cyp4v3	cytochrome P450, family 4, subfamily v, polypeptide 3	-0.91439	DOWNinPregLPSvsPregCtl	0.00172187
67776	Vwa5a	von Willebrand factor A domain containing 5A	-0.954735	DOWNinPregLPSvsPregCtl	0.00173795
72269	Cda	cytidine deaminase	1.58003	UPinPregLPSvsPregCtl	0.00204332
20756	Sprr2b	small proline-rich protein 2B	-1.85453	DOWNinPregLPSvsPregCtl	0.00218569
71900	Tmem106b	transmembrane protein 106B	-0.688285	DOWNinPregLPSvsPregCtl	0.002217
12096	Bglap	bone gamma carboxyglutamate protein	0.729291	UPinPregLPSvsPregCtl	0.00267132
74155	Errfi1	ERBB receptor feedback inhibitor 1	-1.52964	DOWNinPregLPSvsPregCtl	0.00267132
14229	Fkbp5	FK506 binding protein 5	-1.30802	DOWNinPregLPSvsPregCtl	0.00274163
57814	Kcne4	potassium voltage-gated channel, Isk-related subfamily, gene 4	-1.42793	DOWNinPregLPSvsPregCtl	0.00274163
80891	Fcrls	Fc receptor-like S, scavenger receptor	-0.616861	DOWNinPregLPSvsPregCtl	0.00274163
101502	Hsd3b7	hydroxy-delta-5-steroid dehydrogenase, 3 beta- and steroid delta-isomerase 7	-0.766275	DOWNinPregLPSvsPregCtl	0.00274163
16905	Lmna	lamin A	0.919759	UPinPregLPSvsPregCtl	0.00285507
269016	Sh3rf2	SH3 domain containing ring finger 2	1.1777	UPinPregLPSvsPregCtl	0.00285507
17319	Mif	macrophage migration inhibitory factor	0.667126	UPinPregLPSvsPregCtl	0.00285507
93672	Il24	interleukin 24	0.619172	UPinPregLPSvsPregCtl	0.00285507
224860	Plcl2	phospholipase C-like 2	-0.887371	DOWNinPregLPSvsPregCtl	0.00285507
14165	Fgf10	fibroblast growth factor 10	-0.863002	DOWNinPregLPSvsPregCtl	0.00285507
56089	Ramp3	receptor (calcitonin) activity modifying protein 3	2.3483	UPinPregLPSvsPregCtl	0.00285507
320736	Vstm4	V-set and transmembrane domain containing 4	-1.38776	DOWNinPregLPSvsPregCtl	0.00285507
68774	Ms4a6d	membrane-spanning 4-domains, subfamily A, member 6D	0.760425	UPinPregLPSvsPregCtl	0.00285507
140904	Caln1	calneuron 1	0.92005	UPinPregLPSvsPregCtl	0.00285507
214345	Lrrc1	leucine rich repeat containing 1	0.733782	UPinPregLPSvsPregCtl	0.00285507
56277	Tmem45a	transmembrane protein 45a	1.69391	UPinPregLPSvsPregCtl	0.00293709
69538	Antxr1	anthrax toxin receptor 1	-0.989618	DOWNinPregLPSvsPregCtl	0.00298088
213603	Slc44a3	solute carrier family 44, member 3	-0.739523	DOWNinPregLPSvsPregCtl	0.00298983
20293	Ccl12	chemokine (C-C motif) ligand 12	1.13269	UPinPregLPSvsPregCtl	0.00299828
15040	H2-T23	histocompatibility 2, T region locus 23	-0.963911	DOWNinPregLPSvsPregCtl	0.00301111
69538	Antxr1	anthrax toxin receptor 1	-1.01701	DOWNinPregLPSvsPregCtl	0.00302584
18194	Nsdhl	NAD(P) dependent steroid dehydrogenase-like	0.893143	UPinPregLPSvsPregCtl	0.0030367
74145	F13a1	coagulation factor XIII, A1 subunit	-1.28125	DOWNinPregLPSvsPregCtl	0.00349596
19171	Psmb10	proteasome (prosome, macropain) subunit, beta type 10	-0.89592	DOWNinPregLPSvsPregCtl	0.00349596
71994	Cnn3	calponin 3, acidic	-0.945411	DOWNinPregLPSvsPregCtl	0.00358244
80914	Uck2	uridine-cytidine kinase 2	1.363	UPinPregLPSvsPregCtl	0.00362715
15360	Hmgcs2	3-hydroxy-3-methylglutaryl-Coenzyme A synthase 2	-2.91279	DOWNinPregLPSvsPregCtl	0.00362715
74153	Uba7	ubiquitin-like modifier activating enzyme 7	-1.2157	DOWNinPregLPSvsPregCtl	0.00362715
209200	Dtx3l	deltex 3-like (Drosophila)	-1.15332	DOWNinPregLPSvsPregCtl	0.00365541
15460	Hr	hairless	1.43211	UPinPregLPSvsPregCtl	0.00384477
14469	Gbp2	guanylate binding protein 2	-1.98929	DOWNinPregLPSvsPregCtl	0.0039973
21968	Tom1	target of myb1 homolog (chicken)	1.13767	UPinPregLPSvsPregCtl	0.0039973
71667	Tmem248	transmembrane protein 248	0.670011	UPinPregLPSvsPregCtl	0.0039973
54396	Irgm2	immunity-related GTPase family M member 2	-1.76444	DOWNinPregLPSvsPregCtl	0.0039973
14165	Fgf10	fibroblast growth factor 10	-0.914621	DOWNinPregLPSvsPregCtl	0.0039973
233733	Galnt18	UDP-N-acetyl-alpha-D-galactosamine:polypeptide N-acetylgalactosaminyltransferase 18	-0.735858	DOWNinPregLPSvsPregCtl	0.00403952
15039	H2-T22	histocompatibility 2, T region locus 22	-0.975837	DOWNinPregLPSvsPregCtl	0.00415988
268465	Eme1	essential meiotic endonuclease 1 homolog 1 (S. pombe)	1.10442	UPinPregLPSvsPregCtl	0.00417916
108099	Prkag2	protein kinase, AMP-activated, gamma 2 non-catalytic subunit	-0.608896	DOWNinPregLPSvsPregCtl	0.00417916
547253	Parp14	poly (ADP-ribose) polymerase family, member 14	-1.54749	DOWNinPregLPSvsPregCtl	0.00437476
238266	Syt16	synaptotagmin XVI	0.868111	UPinPregLPSvsPregCtl	0.00451301
56089	Ramp3	receptor (calcitonin) activity modifying protein 3	2.08902	UPinPregLPSvsPregCtl	0.00451301
20821	Trim21	tripartite motif-containing 21	-0.768821	DOWNinPregLPSvsPregCtl	0.00451301
20847	Stat2	signal transducer and activator of transcription 2	-0.655648	DOWNinPregLPSvsPregCtl	0.00481661
19171	Psmb10	proteasome (prosome, macropain) subunit, beta type 10	-1.00854	DOWNinPregLPSvsPregCtl	0.00481661
19025	Ctsa	cathepsin A	0.957327	UPinPregLPSvsPregCtl	0.00512517
320078	Olfml2b	olfactomedin-like 2B	-1.23698	DOWNinPregLPSvsPregCtl	0.00512517
12505	Cd44	CD44 antigen	0.839882	UPinPregLPSvsPregCtl	0.0056436
22192	Ube2m	ubiquitin-conjugating enzyme E2M	0.595283	UPinPregLPSvsPregCtl	0.00567605
16905	Lmna	lamin A	0.968423	UPinPregLPSvsPregCtl	0.0056816
12870	Cp	ceruloplasmin	-1.86935	DOWNinPregLPSvsPregCtl	0.00590014
69142	Cd209f	CD209f antigen	-1.22648	DOWNinPregLPSvsPregCtl	0.00609089
58809	Rnase4	ribonuclease, RNase A family 4	-0.76105	DOWNinPregLPSvsPregCtl	0.00688848
70186	Fam162a	family with sequence similarity 162, member A	1.22949	UPinPregLPSvsPregCtl	0.00698233
18602	Padi4	peptidyl arginine deiminase, type IV	1.07236	UPinPregLPSvsPregCtl	0.00704454
17533	Mrc1	mannose receptor, C type 1	-0.997104	DOWNinPregLPSvsPregCtl	0.00704454
27280	Phlda3	pleckstrin homology-like domain, family A, member 3	0.700558	UPinPregLPSvsPregCtl	0.00704454
16905	Lmna	lamin A	0.965584	UPinPregLPSvsPregCtl	0.00704454
329554	Gm826	predicted gene 826	0.648108	UPinPregLPSvsPregCtl	0.00705527
93737	Pard6g	par-6 family cell polarity regulator gamma	1.03679	UPinPregLPSvsPregCtl	0.00705527
72240	1600014C23Rik	RIKEN cDNA 1600014C23 gene	0.939733	UPinPregLPSvsPregCtl	0.00712342
381038	Parl	presenilin associated, rhomboid-like	0.812439	UPinPregLPSvsPregCtl	0.00712342
50772	Mapk6	mitogen-activated protein kinase 6	0.759277	UPinPregLPSvsPregCtl	0.00712342
19739	Rgs9	regulator of G-protein signaling 9	-0.763652	DOWNinPregLPSvsPregCtl	0.00718185
18595	Pdgfra	platelet derived growth factor receptor, alpha polypeptide	-1.12871	DOWNinPregLPSvsPregCtl	0.00718185
21401	Tcea3	transcription elongation factor A (SII), 3	-0.632458	DOWNinPregLPSvsPregCtl	0.00718185
16905	Lmna	lamin A	0.860107	UPinPregLPSvsPregCtl	0.00719361
213484	Nudt18	nudix (nucleoside diphosphate linked moiety X)-type motif 18	0.693518	UPinPregLPSvsPregCtl	0.0073596
107995	Cdc20	cell division cycle 20	0.795883	UPinPregLPSvsPregCtl	0.00758804
19735	Rgs2	regulator of G-protein signaling 2	-0.860679	DOWNinPregLPSvsPregCtl	0.00763084
74176	Tgm5	transglutaminase 5	0.849875	UPinPregLPSvsPregCtl	0.00763084
71914	Antxr2	anthrax toxin receptor 2	-1.25809	DOWNinPregLPSvsPregCtl	0.00763084
20764	Sprr2j-ps	small proline-rich protein 2J, pseudogene	-1.07598	DOWNinPregLPSvsPregCtl	0.00817446
243382	Ppm1k	protein phosphatase 1K (PP2C domain containing)	-0.714219	DOWNinPregLPSvsPregCtl	0.00819851
20763	Sprr2i	small proline-rich protein 2I	-3.01502	DOWNinPregLPSvsPregCtl	0.00834047
11951	Atp5g1	ATP synthase, H+ transporting, mitochondrial F0 complex, subunit C1 (subunit 9)	0.678754	UPinPregLPSvsPregCtl	0.00845978
68636	Fahd1	fumarylacetoacetate hydrolase domain containing 1	-0.585986	DOWNinPregLPSvsPregCtl	0.00845978
242570	Raver2	ribonucleoprotein, PTB-binding 2	-0.872975	DOWNinPregLPSvsPregCtl	0.00852016
20846	Stat1	signal transducer and activator of transcription 1	-0.722408	DOWNinPregLPSvsPregCtl	0.00852107
16145	Igtp	interferon gamma induced GTPase	-1.84869	DOWNinPregLPSvsPregCtl	0.00853491
67671	Rpl38	ribosomal protein L38	1.02804	UPinPregLPSvsPregCtl	0.00853491
80914	Uck2	uridine-cytidine kinase 2	0.914117	UPinPregLPSvsPregCtl	0.00853491
276770	Eif5a	eukaryotic translation initiation factor 5A	0.703145	UPinPregLPSvsPregCtl	0.00853491
11732	Ank	progressive ankylosis	0.797606	UPinPregLPSvsPregCtl	0.00853491
236920	Stard8	START domain containing 8	-0.598597	DOWNinPregLPSvsPregCtl	0.00853491
18788	Serpinb2	serine (or cysteine) peptidase inhibitor, clade B, member 2	2.31085	UPinPregLPSvsPregCtl	0.00859261
208164	Fam180a	family with sequence similarity 180, member A	-1.5644	DOWNinPregLPSvsPregCtl	0.00859261
26879	B3galnt1	UDP-GalNAc:betaGlcNAc beta 1,3-galactosaminyltransferase, polypeptide 1	-0.757302	DOWNinPregLPSvsPregCtl	0.00859261
11637	Ak2	adenylate kinase 2	0.955235	UPinPregLPSvsPregCtl	0.00859261
11785	Apbb1	amyloid beta (A4) precursor protein-binding, family B, member 1	-0.696604	DOWNinPregLPSvsPregCtl	0.00900084
216233	Socs2	suppressor of cytokine signaling 2	-1.1431	DOWNinPregLPSvsPregCtl	0.00907461
16905	Lmna	lamin A	0.852497	UPinPregLPSvsPregCtl	0.00912292
15040	H2-T23	histocompatibility 2, T region locus 23	-0.937012	DOWNinPregLPSvsPregCtl	0.00919369
15944	Irgm1	immunity-related GTPase family M member 1	-1.07485	DOWNinPregLPSvsPregCtl	0.00925557
17855	Mvk	mevalonate kinase	0.996	UPinPregLPSvsPregCtl	0.00950103
103733	Tubg1	tubulin, gamma 1	0.585463	UPinPregLPSvsPregCtl	0.00979531
21354	Tap1	transporter 1, ATP-binding cassette, sub-family B (MDR/TAP)	-1.05178	DOWNinPregLPSvsPregCtl	0.00979531
319909	Ism1	isthmin 1 homolog (zebrafish)	-1.11219	DOWNinPregLPSvsPregCtl	0.00979531
71833	Dcaf7	DDB1 and CUL4 associated factor 7	0.729042	UPinPregLPSvsPregCtl	0.00979531
17319	Mif	macrophage migration inhibitory factor	0.619828	UPinPregLPSvsPregCtl	0.00979531
53415	Htatip2	HIV-1 tat interactive protein 2, homolog (human)	0.764836	UPinPregLPSvsPregCtl	0.00979531
70059	Degs2	degenerative spermatocyte homolog 2 (Drosophila), lipid desaturase	-1.36028	DOWNinPregLPSvsPregCtl	0.00981632
108927	Lhfp	lipoma HMGIC fusion partner	-0.80447	DOWNinPregLPSvsPregCtl	0.00982755
58803	Pga5	pepsinogen 5, group I	-0.658503	DOWNinPregLPSvsPregCtl	0.0100785
208164	Fam180a	family with sequence similarity 180, member A	-1.10835	DOWNinPregLPSvsPregCtl	0.0101498
53415	Htatip2	HIV-1 tat interactive protein 2, homolog (human)	0.749286	UPinPregLPSvsPregCtl	0.0102875
236539	Phgdh	3-phosphoglycerate dehydrogenase	1.02361	UPinPregLPSvsPregCtl	0.0104091
16391	Irf9	interferon regulatory factor 9	-0.813519	DOWNinPregLPSvsPregCtl	0.0104312
107045	Lars	leucyl-tRNA synthetase	0.641802	UPinPregLPSvsPregCtl	0.0104312
434341	Nlrc5	NLR family, CARD domain containing 5	-0.739657	DOWNinPregLPSvsPregCtl	0.0104312
69860	Eif1ad	eukaryotic translation initiation factor 1A domain containing	0.834204	UPinPregLPSvsPregCtl	0.0106145
17768	Mthfd2	methylenetetrahydrofolate dehydrogenase (NAD+ dependent), methenyltetrahydrofolate cyclohydrolase	0.635234	UPinPregLPSvsPregCtl	0.0106145
240725	Sulf1	sulfatase 1	-1.08558	DOWNinPregLPSvsPregCtl	0.0106145
52276	Cdca8	cell division cycle associated 8	0.63665	UPinPregLPSvsPregCtl	0.0106145
21346	Tagln2	transgelin 2	0.761295	UPinPregLPSvsPregCtl	0.0106145
17873	Gadd45b	growth arrest and DNA-damage-inducible 45 beta	0.744548	UPinPregLPSvsPregCtl	0.0107849
16912	Psmb9	proteasome (prosome, macropain) subunit, beta type 9 (large multifunctional peptidase 2)	-1.26175	DOWNinPregLPSvsPregCtl	0.0111374
236920	Stard8	START domain containing 8	-0.688789	DOWNinPregLPSvsPregCtl	0.0111551
11898	Ass1	argininosuccinate synthetase 1	0.911461	UPinPregLPSvsPregCtl	0.0111551
71907	Serpina9	serine (or cysteine) peptidase inhibitor, clade A (alpha-1 antiproteinase, antitrypsin), member 9	1.42554	UPinPregLPSvsPregCtl	0.0113694
19272	Ptprk	protein tyrosine phosphatase, receptor type, K	-0.762111	DOWNinPregLPSvsPregCtl	0.0113918
11637	Ak2	adenylate kinase 2	1.2979	UPinPregLPSvsPregCtl	0.0114499
69064	Fuom	fucose mutarotase	-0.747337	DOWNinPregLPSvsPregCtl	0.0114754
22117	Tst	thiosulfate sulfurtransferase, mitochondrial	1.35812	UPinPregLPSvsPregCtl	0.0114754
13169	Dbnl	drebrin-like	0.595479	UPinPregLPSvsPregCtl	0.0114754
243537	Uroc1	urocanase domain containing 1	0.64737	UPinPregLPSvsPregCtl	0.0114754
55932	Gbp3	guanylate binding protein 3	-1.36464	DOWNinPregLPSvsPregCtl	0.011666
66279	Tmem218	transmembrane protein 218	-0.609326	DOWNinPregLPSvsPregCtl	0.012044
244416	Ppp1r3b	protein phosphatase 1, regulatory (inhibitor) subunit 3B	0.851339	UPinPregLPSvsPregCtl	0.012044
16667	Krt17	keratin 17	2.55784	UPinPregLPSvsPregCtl	0.0121193
68652	Tab2	TGF-beta activated kinase 1/MAP3K7 binding protein 2	0.587521	UPinPregLPSvsPregCtl	0.012128
12023	Barx2	BarH-like homeobox 2	1.05896	UPinPregLPSvsPregCtl	0.0122002
18746	Pkm	pyruvate kinase, muscle	0.586162	UPinPregLPSvsPregCtl	0.0122868
332131	Krt78	keratin 78	2.95625	UPinPregLPSvsPregCtl	0.0124741
104681	Slc16a6	solute carrier family 16 (monocarboxylic acid transporters), member 6	0.742698	UPinPregLPSvsPregCtl	0.0126249
18194	Nsdhl	NAD(P) dependent steroid dehydrogenase-like	0.834354	UPinPregLPSvsPregCtl	0.0128378
107045	Lars	leucyl-tRNA synthetase	0.597146	UPinPregLPSvsPregCtl	0.0131014
15460	Hr	hairless	0.597153	UPinPregLPSvsPregCtl	0.0133609
20302	Ccl3	chemokine (C-C motif) ligand 3	0.8672	UPinPregLPSvsPregCtl	0.0133988
229302	Tm4sf4	transmembrane 4 superfamily member 4	1.33522	UPinPregLPSvsPregCtl	0.0133988
17775	Laptm4a	lysosomal-associated protein transmembrane 4A	-0.809381	DOWNinPregLPSvsPregCtl	0.0133988
18194	Nsdhl	NAD(P) dependent steroid dehydrogenase-like	0.624913	UPinPregLPSvsPregCtl	0.0134389
22422	Wnt7b	wingless-type MMTV integration site family, member 7B	0.753831	UPinPregLPSvsPregCtl	0.0134389
107272	Psat1	phosphoserine aminotransferase 1	1.53136	UPinPregLPSvsPregCtl	0.0134389
16688	Krt6b	keratin 6B	2.80185	UPinPregLPSvsPregCtl	0.0134389
100042355	Gm10705	predicted gene 10705	0.751591	UPinPregLPSvsPregCtl	0.0134389
55932	Gbp3	guanylate binding protein 3	-1.40042	DOWNinPregLPSvsPregCtl	0.0134751
80914	Uck2	uridine-cytidine kinase 2	1.17861	UPinPregLPSvsPregCtl	0.0134751
110196	Fdps	farnesyl diphosphate synthetase	1.30335	UPinPregLPSvsPregCtl	0.0135636
23992	Prkra	protein kinase, interferon inducible double stranded RNA dependent activator	-0.661905	DOWNinPregLPSvsPregCtl	0.0135636
268490	Lsm12	LSM12 homolog (S. cerevisiae)	0.619219	UPinPregLPSvsPregCtl	0.0135947
18102	Nme1	NME/NM23 nucleoside diphosphate kinase 1	0.719169	UPinPregLPSvsPregCtl	0.0135947
67486	Polr3g	polymerase (RNA) III (DNA directed) polypeptide G	1.12192	UPinPregLPSvsPregCtl	0.0135947
66532	Rep15	RAB15 effector protein	-1.50985	DOWNinPregLPSvsPregCtl	0.0135947
56233	Hdac7	histone deacetylase 7	-0.70082	DOWNinPregLPSvsPregCtl	0.0140882
70231	Gorasp2	golgi reassembly stacking protein 2	0.617295	UPinPregLPSvsPregCtl	0.0141208
19184	Psmc5	protease (prosome, macropain) 26S subunit, ATPase 5	0.585386	UPinPregLPSvsPregCtl	0.0142462
52428	Rhpn2	rhophilin, Rho GTPase binding protein 2	-0.664546	DOWNinPregLPSvsPregCtl	0.0144277
20482	Skil	SKI-like	0.797858	UPinPregLPSvsPregCtl	0.0145978
332131	Krt78	keratin 78	2.62093	UPinPregLPSvsPregCtl	0.01461
14621	Gjb4	gap junction protein, beta 4	0.808753	UPinPregLPSvsPregCtl	0.0148119
69852	Tcf23	transcription factor 23	-1.28228	DOWNinPregLPSvsPregCtl	0.0148119
17768	Mthfd2	methylenetetrahydrofolate dehydrogenase (NAD+ dependent), methenyltetrahydrofolate cyclohydrolase	1.30671	UPinPregLPSvsPregCtl	0.0148119
15040	H2-T23	histocompatibility 2, T region locus 23	-1.01383	DOWNinPregLPSvsPregCtl	0.0148119
56743	Lat2	linker for activation of T cells family, member 2	0.989805	UPinPregLPSvsPregCtl	0.0148119
66257	Nicn1	nicolin 1	-0.712973	DOWNinPregLPSvsPregCtl	0.014818
77577	Spns3	spinster homolog 3	0.814521	UPinPregLPSvsPregCtl	0.0149568
74176	Tgm5	transglutaminase 5	1.55731	UPinPregLPSvsPregCtl	0.0150717
19385	Ranbp1	RAN binding protein 1	0.621137	UPinPregLPSvsPregCtl	0.0150917
229898	Gbp5	guanylate binding protein 5	-0.85333	DOWNinPregLPSvsPregCtl	0.0151661
50492	Thop1	thimet oligopeptidase 1	1.05048	UPinPregLPSvsPregCtl	0.0153013
12589	Ift81	intraflagellar transport 81	-0.686603	DOWNinPregLPSvsPregCtl	0.0153707
217732	Cipc	CLOCK interacting protein, circadian	0.801968	UPinPregLPSvsPregCtl	0.0156623
234388	Ccdc124	coiled-coil domain containing 124	0.591908	UPinPregLPSvsPregCtl	0.0164269
11512	Adcy6	adenylate cyclase 6	-0.878395	DOWNinPregLPSvsPregCtl	0.0164269
26450	Rbbp9	retinoblastoma binding protein 9	-0.673992	DOWNinPregLPSvsPregCtl	0.0164269
11637	Ak2	adenylate kinase 2	1.07677	UPinPregLPSvsPregCtl	0.0166234
76574	Mfsd2a	major facilitator superfamily domain containing 2A	0.990846	UPinPregLPSvsPregCtl	0.016628
22344	Vezf1	vascular endothelial zinc finger 1	-0.771953	DOWNinPregLPSvsPregCtl	0.016628
14062	F2r	coagulation factor II (thrombin) receptor	-0.911724	DOWNinPregLPSvsPregCtl	0.0167438
55948	Sfn	stratifin	2.32736	UPinPregLPSvsPregCtl	0.0168141
70967	Eva1c	eva-1 homolog C (C. elegans)	-0.952389	DOWNinPregLPSvsPregCtl	0.0168735
228730	Kiz	kizuna centrosomal protein	-0.67855	DOWNinPregLPSvsPregCtl	0.0168735
66494	Prelid1	PRELI domain containing 1	0.620543	UPinPregLPSvsPregCtl	0.0168786
11752	Anxa8	annexin A8	1.06996	UPinPregLPSvsPregCtl	0.0168786
22670	Trim26	tripartite motif-containing 26	-0.626424	DOWNinPregLPSvsPregCtl	0.0168786
12095	Bglap3	bone gamma-carboxyglutamate protein 3	1.02747	UPinPregLPSvsPregCtl	0.016968
19387	Rangap1	RAN GTPase activating protein 1	0.734685	UPinPregLPSvsPregCtl	0.016968
142688	Asb13	ankyrin repeat and SOCS box-containing 13	-0.786368	DOWNinPregLPSvsPregCtl	0.016968
20293	Ccl12	chemokine (C-C motif) ligand 12	0.913358	UPinPregLPSvsPregCtl	0.016968
78785	Clip4	CAP-GLY domain containing linker protein family, member 4	0.892671	UPinPregLPSvsPregCtl	0.016968
21355	Tap2	transporter 2, ATP-binding cassette, sub-family B (MDR/TAP)	-0.987218	DOWNinPregLPSvsPregCtl	0.016968
71724	Aox3	aldehyde oxidase 3	-1.45729	DOWNinPregLPSvsPregCtl	0.016968
353172	Gars	glycyl-tRNA synthetase	0.605035	UPinPregLPSvsPregCtl	0.016968
212632	Iffo2	intermediate filament family orphan 2	1.6278	UPinPregLPSvsPregCtl	0.016968
16886	Limk2	LIM motif-containing protein kinase 2	0.713598	UPinPregLPSvsPregCtl	0.0174935
17965	Nbl1	neuroblastoma, suppression of tumorigenicity 1	-0.954736	DOWNinPregLPSvsPregCtl	0.0176543
68533	Mphosph6	M phase phosphoprotein 6	0.590635	UPinPregLPSvsPregCtl	0.0177108
57816	Tesc	tescalcin	-0.843411	DOWNinPregLPSvsPregCtl	0.0177249
79202	Tnfrsf22	tumor necrosis factor receptor superfamily, member 22	0.605519	UPinPregLPSvsPregCtl	0.0178066
20846	Stat1	signal transducer and activator of transcription 1	-1.02268	DOWNinPregLPSvsPregCtl	0.0179854
22145	Tuba4a	tubulin, alpha 4A	1.14252	UPinPregLPSvsPregCtl	0.0179854
320712	Abi3bp	ABI gene family, member 3 (NESH) binding protein	-1.16692	DOWNinPregLPSvsPregCtl	0.0179854
619289	Rfx8	regulatory factor X 8	0.712391	UPinPregLPSvsPregCtl	0.0184113
12873	Cpa3	carboxypeptidase A3, mast cell	-0.845887	DOWNinPregLPSvsPregCtl	0.0185812
14866	Gstm5	glutathione S-transferase, mu 5	-0.653664	DOWNinPregLPSvsPregCtl	0.0188474
13638	Efna3	ephrin A3	0.697065	UPinPregLPSvsPregCtl	0.0188578
16653	Kras	v-Ki-ras2 Kirsten rat sarcoma viral oncogene homolog	0.654994	UPinPregLPSvsPregCtl	0.0188578
13032	Ctsc	cathepsin C	-0.632304	DOWNinPregLPSvsPregCtl	0.0188578
276770	Eif5a	eukaryotic translation initiation factor 5A	0.890022	UPinPregLPSvsPregCtl	0.0188578
52014	Nus1	nuclear undecaprenyl pyrophosphate synthase 1 homolog (S. cerevisiae)	0.642452	UPinPregLPSvsPregCtl	0.0189471
71086	4933412E12Rik	RIKEN cDNA 4933412E12 gene	-0.696114	DOWNinPregLPSvsPregCtl	0.0189471
12258	Serping1	serine (or cysteine) peptidase inhibitor, clade G, member 1	-1.22352	DOWNinPregLPSvsPregCtl	0.0189471
12505	Cd44	CD44 antigen	0.938404	UPinPregLPSvsPregCtl	0.0189736
93692	Glrx	glutaredoxin	1.87691	UPinPregLPSvsPregCtl	0.0190713
71141	4933407L21Rik	RIKEN cDNA 4933407L21 gene	-1.26401	DOWNinPregLPSvsPregCtl	0.0193869
22145	Tuba4a	tubulin, alpha 4A	0.842085	UPinPregLPSvsPregCtl	0.0196517
18648	Pgam1	phosphoglycerate mutase 1	0.833047	UPinPregLPSvsPregCtl	0.0196883
104318	Csnk1d	casein kinase 1, delta	0.671552	UPinPregLPSvsPregCtl	0.0197106
381413	Gpr176	G protein-coupled receptor 176	-0.793823	DOWNinPregLPSvsPregCtl	0.0197746
16362	Irf1	interferon regulatory factor 1	-1.21689	DOWNinPregLPSvsPregCtl	0.0204887
14205	Figf	c-fos induced growth factor	-1.08956	DOWNinPregLPSvsPregCtl	0.0204887
13682	Eif4a2	eukaryotic translation initiation factor 4A2	-0.782751	DOWNinPregLPSvsPregCtl	0.020604
226695	Ifi205	interferon activated gene 205	0.690745	UPinPregLPSvsPregCtl	0.0207058
332131	Krt78	keratin 78	2.8455	UPinPregLPSvsPregCtl	0.020779
109731	Maob	monoamine oxidase B	-0.912048	DOWNinPregLPSvsPregCtl	0.020779
69860	Eif1ad	eukaryotic translation initiation factor 1A domain containing	0.842836	UPinPregLPSvsPregCtl	0.0210482
13479	Dpep1	dipeptidase 1 (renal)	-1.08841	DOWNinPregLPSvsPregCtl	0.0211635
108705	Pttg1ip	pituitary tumor-transforming 1 interacting protein	-0.646955	DOWNinPregLPSvsPregCtl	0.0216089
20248	Serpinb3a	serine (or cysteine) peptidase inhibitor, clade B (ovalbumin), member 3A	2.77296	UPinPregLPSvsPregCtl	0.0216154
108960	Irak2	interleukin-1 receptor-associated kinase 2	0.724318	UPinPregLPSvsPregCtl	0.0216644
26450	Rbbp9	retinoblastoma binding protein 9	-0.691389	DOWNinPregLPSvsPregCtl	0.021885
74176	Tgm5	transglutaminase 5	1.40253	UPinPregLPSvsPregCtl	0.0221689
240514	Ccdc85b	coiled-coil domain containing 85B	-0.92642	DOWNinPregLPSvsPregCtl	0.0221689
20520	Slc22a5	solute carrier family 22 (organic cation transporter), member 5	-0.720455	DOWNinPregLPSvsPregCtl	0.0221689
78785	Clip4	CAP-GLY domain containing linker protein family, member 4	0.756255	UPinPregLPSvsPregCtl	0.0221689
170750	Xpnpep1	X-prolyl aminopeptidase (aminopeptidase P) 1, soluble	0.601227	UPinPregLPSvsPregCtl	0.022588
223780	Adm2	adrenomedullin 2	0.588077	UPinPregLPSvsPregCtl	0.0230405
233908	Fus	fused in sarcoma	0.643514	UPinPregLPSvsPregCtl	0.0232673
54445	Unc93b1	unc-93 homolog B1 (C. elegans)	-0.678341	DOWNinPregLPSvsPregCtl	0.0232673
338523	Kdm7a	lysine (K)-specific demethylase 7A	-0.699855	DOWNinPregLPSvsPregCtl	0.0234011
13132	Dab2	disabled 2, mitogen-responsive phosphoprotein	-1.04041	DOWNinPregLPSvsPregCtl	0.0234481
22156	Tuft1	tuftelin 1	1.03321	UPinPregLPSvsPregCtl	0.0234481
57875	Angptl4	angiopoietin-like 4	-1.54032	DOWNinPregLPSvsPregCtl	0.0234481
11727	Ang	angiogenin, ribonuclease, RNase A family, 5	-0.67116	DOWNinPregLPSvsPregCtl	0.0234481
12575	Cdkn1a	cyclin-dependent kinase inhibitor 1A (P21)	1.33144	UPinPregLPSvsPregCtl	0.0234481
632248	Gm7083	predicted gene 7083	0.771703	UPinPregLPSvsPregCtl	0.0234481
80880	Kank3	KN motif and ankyrin repeat domains 3	-0.682405	DOWNinPregLPSvsPregCtl	0.0234481
170750	Xpnpep1	X-prolyl aminopeptidase (aminopeptidase P) 1, soluble	0.755963	UPinPregLPSvsPregCtl	0.0234481
69640	Fam83g	family with sequence similarity 83, member G	1.63774	UPinPregLPSvsPregCtl	0.0234481
50772	Mapk6	mitogen-activated protein kinase 6	0.697054	UPinPregLPSvsPregCtl	0.0234481
26557	Homer2	homer homolog 2 (Drosophila)	1.68137	UPinPregLPSvsPregCtl	0.0234481
19387	Rangap1	RAN GTPase activating protein 1	0.731019	UPinPregLPSvsPregCtl	0.0234481
233908	Fus	fused in sarcoma	0.685685	UPinPregLPSvsPregCtl	0.0234481
67087	Ctnnbip1	catenin beta interacting protein 1	1.55498	UPinPregLPSvsPregCtl	0.0234481
56278	Gkap1	G kinase anchoring protein 1	-0.729517	DOWNinPregLPSvsPregCtl	0.0234481
16362	Irf1	interferon regulatory factor 1	-1.27812	DOWNinPregLPSvsPregCtl	0.0234481
16181	Il1rn	interleukin 1 receptor antagonist	0.809676	UPinPregLPSvsPregCtl	0.0234813
27279	Tnfrsf12a	tumor necrosis factor receptor superfamily, member 12a	1.15986	UPinPregLPSvsPregCtl	0.0234813
52276	Cdca8	cell division cycle associated 8	0.830091	UPinPregLPSvsPregCtl	0.0234813
70809	Clec2g	C-type lectin domain family 2, member g	0.637882	UPinPregLPSvsPregCtl	0.0235688
102334	Ankrd10	ankyrin repeat domain 10	-0.686864	DOWNinPregLPSvsPregCtl	0.0236799
11752	Anxa8	annexin A8	1.19524	UPinPregLPSvsPregCtl	0.0236799
15114	Hap1	huntingtin-associated protein 1	-0.850512	DOWNinPregLPSvsPregCtl	0.0238291
320405	Cadps2	Ca2+-dependent activator protein for secretion 2	-0.903216	DOWNinPregLPSvsPregCtl	0.0238741
73712	Dmkn	dermokine	1.66445	UPinPregLPSvsPregCtl	0.0238741
16913	Psmb8	proteasome (prosome, macropain) subunit, beta type 8 (large multifunctional peptidase 7)	-1.00173	DOWNinPregLPSvsPregCtl	0.0243171
21814	Tgfbr3	transforming growth factor, beta receptor III	-1.13669	DOWNinPregLPSvsPregCtl	0.0247477
14608	Gpr83	G protein-coupled receptor 83	2.28264	UPinPregLPSvsPregCtl	0.0247477
26912	Gcat	glycine C-acetyltransferase (2-amino-3-ketobutyrate-coenzyme A ligase)	1.98166	UPinPregLPSvsPregCtl	0.0247477
66198	Them5	thioesterase superfamily member 5	1.40531	UPinPregLPSvsPregCtl	0.0250452
105278	Cdk20	cyclin-dependent kinase 20	-0.596254	DOWNinPregLPSvsPregCtl	0.0251855
320782	Tmem154	transmembrane protein 154	1.00486	UPinPregLPSvsPregCtl	0.0251855
76943	Psapl1	prosaposin-like 1	2.29331	UPinPregLPSvsPregCtl	0.0251855
228775	Trib3	tribbles homolog 3 (Drosophila)	0.978594	UPinPregLPSvsPregCtl	0.0251855
20672	Sox18	SRY (sex determining region Y)-box 18	-0.789423	DOWNinPregLPSvsPregCtl	0.0251855
20775	Sqle	squalene epoxidase	1.25095	UPinPregLPSvsPregCtl	0.0251855
18824	Plp2	proteolipid protein 2	0.775003	UPinPregLPSvsPregCtl	0.0255319
27280	Phlda3	pleckstrin homology-like domain, family A, member 3	0.679094	UPinPregLPSvsPregCtl	0.0256106
104086	Cyp27a1	cytochrome P450, family 27, subfamily a, polypeptide 1	-0.841169	DOWNinPregLPSvsPregCtl	0.0256398
12575	Cdkn1a	cyclin-dependent kinase inhibitor 1A (P21)	1.30628	UPinPregLPSvsPregCtl	0.0257387
11799	Birc5	baculoviral IAP repeat-containing 5	1.01358	UPinPregLPSvsPregCtl	0.0262066
16592	Fabp5	fatty acid binding protein 5, epidermal	2.43967	UPinPregLPSvsPregCtl	0.0263518
20715	Serpina3g	serine (or cysteine) peptidase inhibitor, clade A, member 3G	-1.84257	DOWNinPregLPSvsPregCtl	0.0263518
66180	P3h4	prolyl 3-hydroxylase family member 4 (non-enzymatic)	1.01421	UPinPregLPSvsPregCtl	0.0264116
64384	Sirt3	sirtuin 3	-0.620778	DOWNinPregLPSvsPregCtl	0.026756
213121	Ankrd35	ankyrin repeat domain 35	0.63327	UPinPregLPSvsPregCtl	0.026965
69554	Klhdc2	kelch domain containing 2	-0.613102	DOWNinPregLPSvsPregCtl	0.0271694
16592	Fabp5	fatty acid binding protein 5, epidermal	2.41412	UPinPregLPSvsPregCtl	0.0271694
13358	Slc25a1	solute carrier family 25 (mitochondrial carrier, citrate transporter), member 1	0.74406	UPinPregLPSvsPregCtl	0.0271958
110196	Fdps	farnesyl diphosphate synthetase	1.05833	UPinPregLPSvsPregCtl	0.0274729
73712	Dmkn	dermokine	1.65093	UPinPregLPSvsPregCtl	0.027879
20393	Sgk1	serum/glucocorticoid regulated kinase 1	-0.842837	DOWNinPregLPSvsPregCtl	0.0280058
27410	Abca3	ATP-binding cassette, sub-family A (ABC1), member 3	-0.801662	DOWNinPregLPSvsPregCtl	0.028052
74137	Nuak2	NUAK family, SNF1-like kinase, 2	1.15753	UPinPregLPSvsPregCtl	0.028052
212285	Arap2	ArfGAP with RhoGAP domain, ankyrin repeat and PH domain 2	1.01915	UPinPregLPSvsPregCtl	0.0282642
15483	Hsd11b1	hydroxysteroid 11-beta dehydrogenase 1	-1.75493	DOWNinPregLPSvsPregCtl	0.0283892
224045	Eif2b5	eukaryotic translation initiation factor 2B, subunit 5 epsilon	0.629573	UPinPregLPSvsPregCtl	0.0283929
68591	Mocos	molybdenum cofactor sulfurase	0.915218	UPinPregLPSvsPregCtl	0.0283999
12873	Cpa3	carboxypeptidase A3, mast cell	-0.817051	DOWNinPregLPSvsPregCtl	0.0284859
68895	Rasl11a	RAS-like, family 11, member A	-0.655107	DOWNinPregLPSvsPregCtl	0.0285694
213121	Ankrd35	ankyrin repeat domain 35	0.846565	UPinPregLPSvsPregCtl	0.0286446
22146	Tuba1c	tubulin, alpha 1C	0.65295	UPinPregLPSvsPregCtl	0.0288209
72432	Spink5	serine peptidase inhibitor, Kazal type 5	1.1393	UPinPregLPSvsPregCtl	0.0289905
228576	Mall	mal, T cell differentiation protein-like	1.11097	UPinPregLPSvsPregCtl	0.029293
217430	Pqlc3	PQ loop repeat containing	1.10743	UPinPregLPSvsPregCtl	0.029293
20539	Slc7a5	solute carrier family 7 (cationic amino acid transporter, y+ system), member 5	1.20279	UPinPregLPSvsPregCtl	0.029293
19735	Rgs2	regulator of G-protein signaling 2	-0.707224	DOWNinPregLPSvsPregCtl	0.0294747
11461	Actb	actin, beta	1.07172	UPinPregLPSvsPregCtl	0.0295368
103743	Tmem98	transmembrane protein 98	-0.676331	DOWNinPregLPSvsPregCtl	0.0297656
20475	Six5	sine oculis-related homeobox 5	-0.588638	DOWNinPregLPSvsPregCtl	0.0298714
17965	Nbl1	neuroblastoma, suppression of tumorigenicity 1	-1.23548	DOWNinPregLPSvsPregCtl	0.029885
72599	Pdia5	protein disulfide isomerase associated 5	-0.856293	DOWNinPregLPSvsPregCtl	0.0299559
12010	B2m	beta-2 microglobulin	-0.827207	DOWNinPregLPSvsPregCtl	0.0299879
69534	Avpi1	arginine vasopressin-induced 1	1.23878	UPinPregLPSvsPregCtl	0.030179
75430	Anapc15	anaphase prompoting complex C subunit 15	0.590043	UPinPregLPSvsPregCtl	0.030179
67742	Samsn1	SAM domain, SH3 domain and nuclear localization signals, 1	0.84071	UPinPregLPSvsPregCtl	0.030179
73710	Tubb2b	tubulin, beta 2B class IIB	0.874422	UPinPregLPSvsPregCtl	0.030179
64176	Sv2b	synaptic vesicle glycoprotein 2 b	-0.999883	DOWNinPregLPSvsPregCtl	0.0302851
75731	Idnk	idnK gluconokinase homolog (E. coli)	-0.641968	DOWNinPregLPSvsPregCtl	0.0305657
100039175	Gm9780	predicted gene 9780	-1.05362	DOWNinPregLPSvsPregCtl	0.030579
14991	H2-M3	histocompatibility 2, M region locus 3	-0.68549	DOWNinPregLPSvsPregCtl	0.0306239
14381	G6pdx	glucose-6-phosphate dehydrogenase X-linked	0.685311	UPinPregLPSvsPregCtl	0.0308674
72042	Cotl1	coactosin-like 1 (Dictyostelium)	0.702298	UPinPregLPSvsPregCtl	0.0309127
12589	Ift81	intraflagellar transport 81	-0.660428	DOWNinPregLPSvsPregCtl	0.0310438
20197	S100a3	S100 calcium binding protein A3	1.28326	UPinPregLPSvsPregCtl	0.0314365
23825	Banf1	barrier to autointegration factor 1	0.658066	UPinPregLPSvsPregCtl	0.0314565
18746	Pkm	pyruvate kinase, muscle	0.621707	UPinPregLPSvsPregCtl	0.0317942
70717	Medag	mesenteric estrogen dependent adipogenesis	-0.737877	DOWNinPregLPSvsPregCtl	0.0320226
93692	Glrx	glutaredoxin	1.80692	UPinPregLPSvsPregCtl	0.0320226
29817	Igfbp7	insulin-like growth factor binding protein 7	-0.792807	DOWNinPregLPSvsPregCtl	0.0320458
70294	Rnf126	ring finger protein 126	0.692736	UPinPregLPSvsPregCtl	0.0320458
18799	Plcd1	phospholipase C, delta 1	1.0252	UPinPregLPSvsPregCtl	0.0322243
208715	Hmgcs1	3-hydroxy-3-methylglutaryl-Coenzyme A synthase 1	0.614101	UPinPregLPSvsPregCtl	0.0322883
625123	Gm6557	predicted gene 6557	1.7161	UPinPregLPSvsPregCtl	0.0325175
654812	Angptl7	angiopoietin-like 7	-1.74458	DOWNinPregLPSvsPregCtl	0.0325763
51801	Ramp1	receptor (calcitonin) activity modifying protein 1	-1.41384	DOWNinPregLPSvsPregCtl	0.0325763
54486	Hpgds	hematopoietic prostaglandin D synthase	-0.777818	DOWNinPregLPSvsPregCtl	0.0326052
12903	Crabp1	cellular retinoic acid binding protein I	0.93523	UPinPregLPSvsPregCtl	0.0326052
19073	Srgn	serglycin	0.863848	UPinPregLPSvsPregCtl	0.0326052
66895	Pxdc1	PX domain containing 1	0.99042	UPinPregLPSvsPregCtl	0.0328495
19164	Psen1	presenilin 1	0.655063	UPinPregLPSvsPregCtl	0.0335074
16365	Irg1	immunoresponsive gene 1	0.775128	UPinPregLPSvsPregCtl	0.0335084
104318	Csnk1d	casein kinase 1, delta	0.623178	UPinPregLPSvsPregCtl	0.0336116
20315	Cxcl12	chemokine (C-X-C motif) ligand 12	-1.43566	DOWNinPregLPSvsPregCtl	0.0336116
13121	Cyp51	cytochrome P450, family 51	1.23018	UPinPregLPSvsPregCtl	0.0342627
15461	Hras	Harvey rat sarcoma virus oncogene	0.962702	UPinPregLPSvsPregCtl	0.0342627
11799	Birc5	baculoviral IAP repeat-containing 5	0.948353	UPinPregLPSvsPregCtl	0.03431
12505	Cd44	CD44 antigen	0.627053	UPinPregLPSvsPregCtl	0.03431
22673	Zfp185	zinc finger protein 185	0.971131	UPinPregLPSvsPregCtl	0.0349164
241520	Fam171b	family with sequence similarity 171, member B	-0.72356	DOWNinPregLPSvsPregCtl	0.0349231
13132	Dab2	disabled 2, mitogen-responsive phosphoprotein	-1.02189	DOWNinPregLPSvsPregCtl	0.0349676
21401	Tcea3	transcription elongation factor A (SII), 3	-0.894995	DOWNinPregLPSvsPregCtl	0.0349676
14998	H2-DMa	histocompatibility 2, class II, locus DMa	-0.813834	DOWNinPregLPSvsPregCtl	0.0350447
67895	Ppa1	pyrophosphatase (inorganic) 1	0.681677	UPinPregLPSvsPregCtl	0.035122
17750	Mt2	metallothionein 2	1.00062	UPinPregLPSvsPregCtl	0.035122
20510	Slc1a1	solute carrier family 1 (neuronal/epithelial high affinity glutamate transporter, system Xag), member 1	-0.676127	DOWNinPregLPSvsPregCtl	0.0354946
76650	Srxn1	sulfiredoxin 1 homolog (S. cerevisiae)	0.808018	UPinPregLPSvsPregCtl	0.0356595
15483	Hsd11b1	hydroxysteroid 11-beta dehydrogenase 1	-1.68734	DOWNinPregLPSvsPregCtl	0.0356974
17474	Clec4d	C-type lectin domain family 4, member d	1.11408	UPinPregLPSvsPregCtl	0.0357861
14528	Gch1	GTP cyclohydrolase 1	0.836609	UPinPregLPSvsPregCtl	0.0359857
17919	Myo5b	myosin VB	0.862635	UPinPregLPSvsPregCtl	0.0362964
17309	Mgat3	mannoside acetylglucosaminyltransferase 3	-0.959624	DOWNinPregLPSvsPregCtl	0.0363355
230514	Leprot	leptin receptor overlapping transcript	-0.589344	DOWNinPregLPSvsPregCtl	0.0367032
17068	Ly6d	lymphocyte antigen 6 complex, locus D	2.09633	UPinPregLPSvsPregCtl	0.0367032
27053	Asns	asparagine synthetase	1.0712	UPinPregLPSvsPregCtl	0.036738
66198	Them5	thioesterase superfamily member 5	1.89866	UPinPregLPSvsPregCtl	0.0368714
93671	Cd163	CD163 antigen	-0.592269	DOWNinPregLPSvsPregCtl	0.0368714
20208	Saa1	serum amyloid A 1	-2.64339	DOWNinPregLPSvsPregCtl	0.0368714
24088	Tlr2	toll-like receptor 2	-0.76425	DOWNinPregLPSvsPregCtl	0.0370057
20248	Serpinb3a	serine (or cysteine) peptidase inhibitor, clade B (ovalbumin), member 3A	0.869394	UPinPregLPSvsPregCtl	0.0370057
15483	Hsd11b1	hydroxysteroid 11-beta dehydrogenase 1	-1.71386	DOWNinPregLPSvsPregCtl	0.0370057
64661	Krtdap	keratinocyte differentiation associated protein	2.67103	UPinPregLPSvsPregCtl	0.0376265
18772	Pkp1	plakophilin 1	1.61469	UPinPregLPSvsPregCtl	0.03785
67568	Mrfap1	Morf4 family associated protein 1	0.78117	UPinPregLPSvsPregCtl	0.03785
20969	Sdc1	syndecan 1	1.0725	UPinPregLPSvsPregCtl	0.03785
66868	Mfsd1	major facilitator superfamily domain containing 1	-0.594018	DOWNinPregLPSvsPregCtl	0.0379516
13510	Dsg1a	desmoglein 1 alpha	0.7815	UPinPregLPSvsPregCtl	0.0380462
71660	Rarres2	retinoic acid receptor responder (tazarotene induced) 2	-1.1466	DOWNinPregLPSvsPregCtl	0.0380767
20363	Sepp1	selenoprotein P, plasma, 1	-0.877469	DOWNinPregLPSvsPregCtl	0.0381427
20716	Serpina3n	serine (or cysteine) peptidase inhibitor, clade A, member 3N	-1.36103	DOWNinPregLPSvsPregCtl	0.0382737
269016	Sh3rf2	SH3 domain containing ring finger 2	0.614627	UPinPregLPSvsPregCtl	0.038506
78248	Armcx1	armadillo repeat containing, X-linked 1	-0.675222	DOWNinPregLPSvsPregCtl	0.038506
75686	Nudt16	nudix (nucleoside diphosphate linked moiety X)-type motif 16	-0.638112	DOWNinPregLPSvsPregCtl	0.038846
16009	Igfbp3	insulin-like growth factor binding protein 3	0.785047	UPinPregLPSvsPregCtl	0.0394025
105171	Arrdc3	arrestin domain containing 3	-0.667099	DOWNinPregLPSvsPregCtl	0.0394889
68877	Maf1	MAF1 homolog (S. cerevisiae)	-0.693179	DOWNinPregLPSvsPregCtl	0.0396643
218294	Cdc14b	CDC14 cell division cycle 14B	0.644877	UPinPregLPSvsPregCtl	0.0396721
626870	Gm11992	predicted gene 11992	1.44111	UPinPregLPSvsPregCtl	0.0396721
242285	Sdr16c5	short chain dehydrogenase/reductase family 16C, member 5	1.62073	UPinPregLPSvsPregCtl	0.0400987
74732	Stx11	syntaxin 11	0.721935	UPinPregLPSvsPregCtl	0.0401968
110175	Ggct	gamma-glutamyl cyclotransferase	0.655963	UPinPregLPSvsPregCtl	0.0406466
212503	Paox	polyamine oxidase (exo-N4-amino)	-0.617479	DOWNinPregLPSvsPregCtl	0.04073
212632	Iffo2	intermediate filament family orphan 2	1.36217	UPinPregLPSvsPregCtl	0.0407707
14778	Gpx3	glutathione peroxidase 3	-1.00219	DOWNinPregLPSvsPregCtl	0.0407707
23962	Oasl2	2'-5' oligoadenylate synthetase-like 2	-1.22651	DOWNinPregLPSvsPregCtl	0.0411435
109129	Mmadhc	methylmalonic aciduria (cobalamin deficiency) cblD type, with homocystinuria	0.628699	UPinPregLPSvsPregCtl	0.0411435
12575	Cdkn1a	cyclin-dependent kinase inhibitor 1A (P21)	1.13918	UPinPregLPSvsPregCtl	0.0411978
16774	Lama3	laminin, alpha 3	0.924175	UPinPregLPSvsPregCtl	0.0411978
54151	Cyhr1	cysteine and histidine rich 1	-0.636767	DOWNinPregLPSvsPregCtl	0.0411978
228071	Sestd1	SEC14 and spectrin domains 1	-0.755835	DOWNinPregLPSvsPregCtl	0.0413554
330962	Slc51b	solute carrier family 51, beta subunit	-1.42963	DOWNinPregLPSvsPregCtl	0.0413554
213391	Rassf4	Ras association (RalGDS/AF-6) domain family member 4	-0.64819	DOWNinPregLPSvsPregCtl	0.0420878
98365	Slamf9	SLAM family member 9	0.685297	UPinPregLPSvsPregCtl	0.0420878
654812	Angptl7	angiopoietin-like 7	-2.58458	DOWNinPregLPSvsPregCtl	0.0420878
104625	Cnot6	CCR4-NOT transcription complex, subunit 6	0.610752	UPinPregLPSvsPregCtl	0.0423155
17227	Mcpt4	mast cell protease 4	-0.592187	DOWNinPregLPSvsPregCtl	0.0423155
14756	Gpld1	glycosylphosphatidylinositol specific phospholipase D1	0.602057	UPinPregLPSvsPregCtl	0.0423155
319168	Hist1h2ah	histone cluster 1, H2ah	1.19273	UPinPregLPSvsPregCtl	0.0424971
14998	H2-DMa	histocompatibility 2, class II, locus DMa	-0.651514	DOWNinPregLPSvsPregCtl	0.0425483
18669	Abcb1b	ATP-binding cassette, sub-family B (MDR/TAP), member 1B	-1.48698	DOWNinPregLPSvsPregCtl	0.0427092
16688	Krt6b	keratin 6B	2.25696	UPinPregLPSvsPregCtl	0.0427977
23972	Papss2	3'-phosphoadenosine 5'-phosphosulfate synthase 2	-1.29479	DOWNinPregLPSvsPregCtl	0.0434115
320717	Pptc7	PTC7 protein phosphatase homolog (S. cerevisiae)	-0.672613	DOWNinPregLPSvsPregCtl	0.0438953
20307	Ccl8	chemokine (C-C motif) ligand 8	-1.3941	DOWNinPregLPSvsPregCtl	0.0438953
66264	Ccdc28b	coiled coil domain containing 28B	-0.763225	DOWNinPregLPSvsPregCtl	0.0443997
109620	Dsp	desmoplakin	1.36754	UPinPregLPSvsPregCtl	0.0443997
170757	Eltd1	EGF, latrophilin seven transmembrane domain containing 1	-0.654844	DOWNinPregLPSvsPregCtl	0.044454
433182	Eno1b	enolase 1B, retrotransposed	0.639683	UPinPregLPSvsPregCtl	0.0446172
226970	Arhgef4	Rho guanine nucleotide exchange factor (GEF) 4	1.01365	UPinPregLPSvsPregCtl	0.0450875
20377	Sfrp1	secreted frizzled-related protein 1	-0.859633	DOWNinPregLPSvsPregCtl	0.0451935
67382	Brd3	bromodomain containing 3	-0.612693	DOWNinPregLPSvsPregCtl	0.0453149
320204	Mettl20	methyltransferase like 20	-0.610908	DOWNinPregLPSvsPregCtl	0.0453369
69847	Wnk4	WNK lysine deficient protein kinase 4	0.944975	UPinPregLPSvsPregCtl	0.0453369
16206	Lrig1	leucine-rich repeats and immunoglobulin-like domains 1	-0.781539	DOWNinPregLPSvsPregCtl	0.0459637
12258	Serping1	serine (or cysteine) peptidase inhibitor, clade G, member 1	-1.11957	DOWNinPregLPSvsPregCtl	0.0459689
74015	Fcho1	FCH domain only 1	0.675075	UPinPregLPSvsPregCtl	0.0460583
77411	Esrp2	epithelial splicing regulatory protein 2	0.706456	UPinPregLPSvsPregCtl	0.0460583
320365	Fry	furry homolog (Drosophila)	-0.605849	DOWNinPregLPSvsPregCtl	0.0464891
101401	Adamts9	a disintegrin-like and metallopeptidase (reprolysin type) with thrombospondin type 1 motif, 9	-0.874921	DOWNinPregLPSvsPregCtl	0.046695
78294	Rps27a	ribosomal protein S27A	0.80952	UPinPregLPSvsPregCtl	0.046782
229211	Acad9	acyl-Coenzyme A dehydrogenase family, member 9	0.704508	UPinPregLPSvsPregCtl	0.0469895
217430	Pqlc3	PQ loop repeat containing	0.827119	UPinPregLPSvsPregCtl	0.0470012
66910	Tmem107	transmembrane protein 107	-0.645444	DOWNinPregLPSvsPregCtl	0.047006
116847	Prelp	proline arginine-rich end leucine-rich repeat	-1.38636	DOWNinPregLPSvsPregCtl	0.047105
68177	Ebpl	emopamil binding protein-like	-0.678829	DOWNinPregLPSvsPregCtl	0.047105
231801	Agfg2	ArfGAP with FG repeats 2	-0.60641	DOWNinPregLPSvsPregCtl	0.047105
234734	Aars	alanyl-tRNA synthetase	0.673365	UPinPregLPSvsPregCtl	0.047105
67486	Polr3g	polymerase (RNA) III (DNA directed) polypeptide G	0.935951	UPinPregLPSvsPregCtl	0.0473423
215653	Rassf2	Ras association (RalGDS/AF-6) domain family member 2	-0.812931	DOWNinPregLPSvsPregCtl	0.0477445
16687	Krt6a	keratin 6A	1.61138	UPinPregLPSvsPregCtl	0.0477867
17532	Mras	muscle and microspikes RAS	-1.19753	DOWNinPregLPSvsPregCtl	0.0478494
20201	S100a8	S100 calcium binding protein A8 (calgranulin A)	2.6088	UPinPregLPSvsPregCtl	0.0478494
56418	Ykt6	YKT6 homolog (S. Cerevisiae)	0.587709	UPinPregLPSvsPregCtl	0.0482827
57437	Golga7	golgi autoantigen, golgin subfamily a, 7	0.747662	UPinPregLPSvsPregCtl	0.04843
108682	Gpt2	glutamic pyruvate transaminase (alanine aminotransferase) 2	0.902149	UPinPregLPSvsPregCtl	0.0485131
432986	Gm5477	type II keratin Kb16P	1.62533	UPinPregLPSvsPregCtl	0.0489704
66753	Erlec1	endoplasmic reticulum lectin 1	-0.599099	DOWNinPregLPSvsPregCtl	0.0489704
11799	Birc5	baculoviral IAP repeat-containing 5	0.88078	UPinPregLPSvsPregCtl	0.0490915
14620	Gjb3	gap junction protein, beta 3	0.958517	UPinPregLPSvsPregCtl	0.0493185
100616095	Snhg18	small nucleolar RNA host gene 18	-0.619058	DOWNinPregLPSvsPregCtl	0.0494923
54486	Hpgds	hematopoietic prostaglandin D synthase	-0.694426	DOWNinPregLPSvsPregCtl	0.0500092
107995	Cdc20	cell division cycle 20	0.692001	UPinPregLPSvsPregCtl	0.0502403
16854	Lgals3	lectin, galactose binding, soluble 3	0.769275	UPinPregLPSvsPregCtl	0.0505003
13849	Ephx1	epoxide hydrolase 1, microsomal	-0.952724	DOWNinPregLPSvsPregCtl	0.0507
66279	Tmem218	transmembrane protein 218	-0.665886	DOWNinPregLPSvsPregCtl	0.0509094
105501	Abhd4	abhydrolase domain containing 4	-0.587839	DOWNinPregLPSvsPregCtl	0.0510008
101502	Hsd3b7	hydroxy-delta-5-steroid dehydrogenase, 3 beta- and steroid delta-isomerase 7	-0.821625	DOWNinPregLPSvsPregCtl	0.0517225
171388	Bnipl	BCL2/adenovirus E1B 19kD interacting protein like	0.96814	UPinPregLPSvsPregCtl	0.0517225
233406	Prc1	protein regulator of cytokinesis 1	0.764827	UPinPregLPSvsPregCtl	0.0517225
20129	Rptn	repetin	2.60431	UPinPregLPSvsPregCtl	0.0517225
69581	Rhou	ras homolog gene family, member U	-0.66702	DOWNinPregLPSvsPregCtl	0.0534983
11671	Aldh3a2	aldehyde dehydrogenase family 3, subfamily A2	-0.633024	DOWNinPregLPSvsPregCtl	0.0534983
140742	Sesn1	sestrin 1	-0.597474	DOWNinPregLPSvsPregCtl	0.0548307
76650	Srxn1	sulfiredoxin 1 homolog (S. cerevisiae)	0.789907	UPinPregLPSvsPregCtl	0.054891
216505	Pik3ip1	phosphoinositide-3-kinase interacting protein 1	-0.728638	DOWNinPregLPSvsPregCtl	0.054891
18626	Per1	period circadian clock 1	-0.605909	DOWNinPregLPSvsPregCtl	0.054891
58203	Zbp1	Z-DNA binding protein 1	0.817298	UPinPregLPSvsPregCtl	0.0549396
232943	Klc3	kinesin light chain 3	0.763171	UPinPregLPSvsPregCtl	0.0551957
66447	Mgst3	microsomal glutathione S-transferase 3	0.650815	UPinPregLPSvsPregCtl	0.0552501
20250	Scd2	stearoyl-Coenzyme A desaturase 2	0.670496	UPinPregLPSvsPregCtl	0.0553537
100504038	Gm20027	predicted gene, 20027	-0.738399	DOWNinPregLPSvsPregCtl	0.0553652
319169	Hist1h2ak	histone cluster 1, H2ak	1.14732	UPinPregLPSvsPregCtl	0.0553927
27410	Abca3	ATP-binding cassette, sub-family A (ABC1), member 3	-0.898687	DOWNinPregLPSvsPregCtl	0.0554725
14793	Cdca3	cell division cycle associated 3	0.874677	UPinPregLPSvsPregCtl	0.0554993
12023	Barx2	BarH-like homeobox 2	0.682849	UPinPregLPSvsPregCtl	0.0556495
56442	Serinc1	serine incorporator 1	-0.596119	DOWNinPregLPSvsPregCtl	0.0557271
15481	Hspa8	heat shock protein 8	-0.612926	DOWNinPregLPSvsPregCtl	0.0557889
67306	Zc2hc1a	zinc finger, C2HC-type containing 1A	-0.70966	DOWNinPregLPSvsPregCtl	0.0558218
17345	Mki67	antigen identified by monoclonal antibody Ki 67	0.653975	UPinPregLPSvsPregCtl	0.0558327
93842	Igsf9	immunoglobulin superfamily, member 9	0.807298	UPinPregLPSvsPregCtl	0.0558327
20862	Stfa2	stefin A2	2.04089	UPinPregLPSvsPregCtl	0.0561312
16365	Irg1	immunoresponsive gene 1	0.885349	UPinPregLPSvsPregCtl	0.0562634
70747	Tspan2	tetraspanin 2	-0.808101	DOWNinPregLPSvsPregCtl	0.0563164
195733	Grhl1	grainyhead-like 1 (Drosophila)	0.661562	UPinPregLPSvsPregCtl	0.0566065
320997	Cyp4f39	cytochrome P450, family 4, subfamily f, polypeptide 39	1.57495	UPinPregLPSvsPregCtl	0.0566065
17756	Map2	microtubule-associated protein 2	1.13877	UPinPregLPSvsPregCtl	0.0566065
229211	Acad9	acyl-Coenzyme A dehydrogenase family, member 9	0.718195	UPinPregLPSvsPregCtl	0.056903
207175	Cetn4	centrin 4	-0.585198	DOWNinPregLPSvsPregCtl	0.0576685
19039	Lgals3bp	lectin, galactoside-binding, soluble, 3 binding protein	-1.31543	DOWNinPregLPSvsPregCtl	0.0578298
14181	Fgfbp1	fibroblast growth factor binding protein 1	1.37413	UPinPregLPSvsPregCtl	0.0578298
105352	Dusp22	dual specificity phosphatase 22	0.77514	UPinPregLPSvsPregCtl	0.0579194
106522	Pkdcc	protein kinase domain containing, cytoplasmic	-0.690236	DOWNinPregLPSvsPregCtl	0.0579538
212531	Sh3bgrl2	SH3 domain binding glutamic acid-rich protein like 2	0.879914	UPinPregLPSvsPregCtl	0.0580324
68949	1500012F01Rik	RIKEN cDNA 1500012F01 gene	-0.769836	DOWNinPregLPSvsPregCtl	0.0580339
17068	Ly6d	lymphocyte antigen 6 complex, locus D	1.99785	UPinPregLPSvsPregCtl	0.0582216
72515	Wdr43	WD repeat domain 43	0.596773	UPinPregLPSvsPregCtl	0.0582368
269589	Sytl1	synaptotagmin-like 1	1.06065	UPinPregLPSvsPregCtl	0.058321
319168	Hist1h2ah	histone cluster 1, H2ah	1.08198	UPinPregLPSvsPregCtl	0.0586233
226122	Ubtd1	ubiquitin domain containing 1	0.597566	UPinPregLPSvsPregCtl	0.0586233
70717	Medag	mesenteric estrogen dependent adipogenesis	-0.599858	DOWNinPregLPSvsPregCtl	0.0586233
112407	Egln3	egl-9 family hypoxia-inducible factor 3	1.54103	UPinPregLPSvsPregCtl	0.0586233
20741	Sptb	spectrin beta, erythrocytic	-1.46441	DOWNinPregLPSvsPregCtl	0.058922
11810	Apobec1	apolipoprotein B mRNA editing enzyme, catalytic polypeptide 1	-0.771446	DOWNinPregLPSvsPregCtl	0.058922
20525	Slc2a1	solute carrier family 2 (facilitated glucose transporter), member 1	0.921928	UPinPregLPSvsPregCtl	0.05921
21681	Alyref	Aly/REF export factor	0.662865	UPinPregLPSvsPregCtl	0.05921
104086	Cyp27a1	cytochrome P450, family 27, subfamily a, polypeptide 1	-0.75741	DOWNinPregLPSvsPregCtl	0.06038
15901	Id1	inhibitor of DNA binding 1	0.847362	UPinPregLPSvsPregCtl	0.0604644
195733	Grhl1	grainyhead-like 1 (Drosophila)	1.25487	UPinPregLPSvsPregCtl	0.0607506
16763	Lad1	ladinin	1.13119	UPinPregLPSvsPregCtl	0.0608561
21885	Tle1	transducin-like enhancer of split 1, homolog of Drosophila E(spl)	-0.736838	DOWNinPregLPSvsPregCtl	0.0609681
52033	Pbk	PDZ binding kinase	0.838629	UPinPregLPSvsPregCtl	0.0610546
16687	Krt6a	keratin 6A	1.71999	UPinPregLPSvsPregCtl	0.0614843
14745	Lpar1	lysophosphatidic acid receptor 1	-0.619347	DOWNinPregLPSvsPregCtl	0.0615108
81877	Tnxb	tenascin XB	-0.788512	DOWNinPregLPSvsPregCtl	0.0615108
64661	Krtdap	keratinocyte differentiation associated protein	2.21493	UPinPregLPSvsPregCtl	0.0621442
231713	Naa25	N(alpha)-acetyltransferase 25, NatB auxiliary subunit	0.632618	UPinPregLPSvsPregCtl	0.0622204
72169	Trim29	tripartite motif-containing 29	1.26945	UPinPregLPSvsPregCtl	0.0623281
80718	Rab27b	RAB27B, member RAS oncogene family	0.596177	UPinPregLPSvsPregCtl	0.0623729
544817	Arhgap27	Rho GTPase activating protein 27	0.646289	UPinPregLPSvsPregCtl	0.0623729
414801	Itprip	inositol 1,4,5-triphosphate receptor interacting protein	0.915813	UPinPregLPSvsPregCtl	0.0626671
16909	Lmo2	LIM domain only 2	-0.724713	DOWNinPregLPSvsPregCtl	0.0626671
66260	Tmem54	transmembrane protein 54	1.40207	UPinPregLPSvsPregCtl	0.0626671
239530	Gpr20	G protein-coupled receptor 20	0.899501	UPinPregLPSvsPregCtl	0.0628256
74338	Slc6a19	solute carrier family 6 (neurotransmitter transporter), member 19	1.43477	UPinPregLPSvsPregCtl	0.0628982
11610	Agtrap	angiotensin II, type I receptor-associated protein	-0.632309	DOWNinPregLPSvsPregCtl	0.0630559
75604	Tm4sf5	transmembrane 4 superfamily member 5	0.708938	UPinPregLPSvsPregCtl	0.0633792
54325	Elovl1	elongation of very long chain fatty acids (FEN1/Elo2, SUR4/Elo3, yeast)-like 1	0.594449	UPinPregLPSvsPregCtl	0.0633792
76478	Haus8	4HAUS augmin-like complex, subunit 8	-0.831789	DOWNinPregLPSvsPregCtl	0.0635247
74868	Tmem65	transmembrane protein 65	0.643865	UPinPregLPSvsPregCtl	0.0635247
55925	Syt8	synaptotagmin VIII	0.602544	UPinPregLPSvsPregCtl	0.0638552
72042	Cotl1	coactosin-like 1 (Dictyostelium)	0.617138	UPinPregLPSvsPregCtl	0.064934
56016	Hebp2	heme binding protein 2	1.0448	UPinPregLPSvsPregCtl	0.065065
230824	Grhl3	grainyhead-like 3 (Drosophila)	0.884483	UPinPregLPSvsPregCtl	0.0656031
104458	Rars	arginyl-tRNA synthetase	0.620685	UPinPregLPSvsPregCtl	0.065642
14858	Gsta2	glutathione S-transferase, alpha 2 (Yc2)	1.1763	UPinPregLPSvsPregCtl	0.0659139
74645	Fam46c	family with sequence similarity 46, member C	-0.702238	DOWNinPregLPSvsPregCtl	0.0659376
98496	Pid1	phosphotyrosine interaction domain containing 1	-0.746221	DOWNinPregLPSvsPregCtl	0.0660762
71660	Rarres2	retinoic acid receptor responder (tazarotene induced) 2	-0.955371	DOWNinPregLPSvsPregCtl	0.0660762
74868	Tmem65	transmembrane protein 65	0.713774	UPinPregLPSvsPregCtl	0.0668722
19346	Rab6a	RAB6A, member RAS oncogene family	0.682731	UPinPregLPSvsPregCtl	0.0669307
268417	Zkscan17	zinc finger with KRAB and SCAN domains 17	-0.83133	DOWNinPregLPSvsPregCtl	0.0670396
15925	Ide	insulin degrading enzyme	0.930912	UPinPregLPSvsPregCtl	0.0673471
28077	Med10	mediator complex subunit 10	0.585581	UPinPregLPSvsPregCtl	0.0673471
66508	Lamtor1	late endosomal/lysosomal adaptor, MAPK and MTOR activator 1	0.691777	UPinPregLPSvsPregCtl	0.0677008
546143	Ccpg1os	cell cycle progression 1, opposite strand	-0.602171	DOWNinPregLPSvsPregCtl	0.0677008
56338	Txnip	thioredoxin interacting protein	-1.04326	DOWNinPregLPSvsPregCtl	0.0677008
13179	Dcn	decorin	-0.721264	DOWNinPregLPSvsPregCtl	0.0677008
230824	Grhl3	grainyhead-like 3 (Drosophila)	0.715619	UPinPregLPSvsPregCtl	0.0679854
54200	Sult2b1	sulfotransferase family, cytosolic, 2B, member 1	0.684631	UPinPregLPSvsPregCtl	0.0686335
69534	Avpi1	arginine vasopressin-induced 1	1.21969	UPinPregLPSvsPregCtl	0.0686337
24108	Ubd	ubiquitin D	-1.28883	DOWNinPregLPSvsPregCtl	0.0691687
27053	Asns	asparagine synthetase	0.989172	UPinPregLPSvsPregCtl	0.069399
16678	Krt1	keratin 1	2.64581	UPinPregLPSvsPregCtl	0.0694207
16332	Inppl1	inositol polyphosphate phosphatase-like 1	-0.695419	DOWNinPregLPSvsPregCtl	0.0695065
12010	B2m	beta-2 microglobulin	-0.764696	DOWNinPregLPSvsPregCtl	0.0695783
81877	Tnxb	tenascin XB	-0.715486	DOWNinPregLPSvsPregCtl	0.0698352
57319	Smpdl3a	sphingomyelin phosphodiesterase, acid-like 3A	-0.792536	DOWNinPregLPSvsPregCtl	0.0704976
67921	Ube2f	ubiquitin-conjugating enzyme E2F (putative)	0.678554	UPinPregLPSvsPregCtl	0.0710455
60599	Trp53inp1	transformation related protein 53 inducible nuclear protein 1	-0.628637	DOWNinPregLPSvsPregCtl	0.0712927
13682	Eif4a2	eukaryotic translation initiation factor 4A2	-0.629451	DOWNinPregLPSvsPregCtl	0.071922
21826	Thbs2	thrombospondin 2	1.68389	UPinPregLPSvsPregCtl	0.0723281
192212	Prom2	prominin 2	1.03084	UPinPregLPSvsPregCtl	0.0723281
14799	Gria1	glutamate receptor, ionotropic, AMPA1 (alpha 1)	-0.866736	DOWNinPregLPSvsPregCtl	0.0723281
15368	Hmox1	heme oxygenase (decycling) 1	1.24867	UPinPregLPSvsPregCtl	0.0723281
14583	Gfpt1	glutamine fructose-6-phosphate transaminase 1	-1.00571	DOWNinPregLPSvsPregCtl	0.0723281
24110	Usp18	ubiquitin specific peptidase 18	-0.801539	DOWNinPregLPSvsPregCtl	0.0725285
14571	Gpd2	glycerol phosphate dehydrogenase 2, mitochondrial	0.653641	UPinPregLPSvsPregCtl	0.0725475
11639	Ak4	adenylate kinase 4	0.733879	UPinPregLPSvsPregCtl	0.0727481
20442	St3gal1	ST3 beta-galactoside alpha-2,3-sialyltransferase 1	-0.749964	DOWNinPregLPSvsPregCtl	0.0727481
625060	Gm6551	predicted gene 6551	1.84052	UPinPregLPSvsPregCtl	0.0733164
14824	Grn	granulin	-0.885009	DOWNinPregLPSvsPregCtl	0.0734524
15374	Hn1	hematological and neurological expressed sequence 1	0.648973	UPinPregLPSvsPregCtl	0.0741243
71908	Cldn23	claudin 23	0.590258	UPinPregLPSvsPregCtl	0.0745792
14178	Fgf7	fibroblast growth factor 7	-1.12707	DOWNinPregLPSvsPregCtl	0.0746393
74253	Klrg2	killer cell lectin-like receptor subfamily G, member 2	0.702623	UPinPregLPSvsPregCtl	0.0746393
54613	St3gal6	ST3 beta-galactoside alpha-2,3-sialyltransferase 6	-0.886187	DOWNinPregLPSvsPregCtl	0.0753537
27078	B9d1	B9 protein domain 1	-0.587427	DOWNinPregLPSvsPregCtl	0.0754811
20305	Ccl6	chemokine (C-C motif) ligand 6	-0.652101	DOWNinPregLPSvsPregCtl	0.075719
20301	Ccl27a	chemokine (C-C motif) ligand 27A	-0.639563	DOWNinPregLPSvsPregCtl	0.0759155
107221	Ffar4	free fatty acid receptor 4	1.12088	UPinPregLPSvsPregCtl	0.076137
19881	Rom1	rod outer segment membrane protein 1	-0.982909	DOWNinPregLPSvsPregCtl	0.076137
56455	Dynll1	dynein light chain LC8-type 1	0.588968	UPinPregLPSvsPregCtl	0.0761889
50781	Dkk3	dickkopf homolog 3 (Xenopus laevis)	-0.824398	DOWNinPregLPSvsPregCtl	0.076257
69543	Capns2	calpain, small subunit 2	1.74709	UPinPregLPSvsPregCtl	0.0762745
170459	Stard4	StAR-related lipid transfer (START) domain containing 4	0.70384	UPinPregLPSvsPregCtl	0.0762745
16332	Inppl1	inositol polyphosphate phosphatase-like 1	-0.637875	DOWNinPregLPSvsPregCtl	0.0766179
269529	Fbxo10	F-box protein 10	-0.808551	DOWNinPregLPSvsPregCtl	0.0766179
16337	Insr	insulin receptor	-0.783498	DOWNinPregLPSvsPregCtl	0.0767276
26364	Cd97	CD97 antigen	-0.604307	DOWNinPregLPSvsPregCtl	0.0770489
72293	Nkd2	naked cuticle 2 homolog (Drosophila)	-0.689296	DOWNinPregLPSvsPregCtl	0.0772103
319875	Tmprss11b	transmembrane protease, serine 11B	0.743742	UPinPregLPSvsPregCtl	0.0772113
68953	Chmp2a	charged multivesicular body protein 2A	0.591972	UPinPregLPSvsPregCtl	0.0775631
208846	Daam1	dishevelled associated activator of morphogenesis 1	0.613063	UPinPregLPSvsPregCtl	0.0777531
68187	Fam135a	family with sequence similarity 135, member A	0.685327	UPinPregLPSvsPregCtl	0.0786472
67603	Dusp6	dual specificity phosphatase 6	-0.743019	DOWNinPregLPSvsPregCtl	0.0791562
81877	Tnxb	tenascin XB	-0.804259	DOWNinPregLPSvsPregCtl	0.079286
57738	Slc15a2	solute carrier family 15 (H+/peptide transporter), member 2	-0.70653	DOWNinPregLPSvsPregCtl	0.0795436
20208	Saa1	serum amyloid A 1	-0.660247	DOWNinPregLPSvsPregCtl	0.0799114
18301	Fxyd5	FXYD domain-containing ion transport regulator 5	0.699302	UPinPregLPSvsPregCtl	0.0800932
67454	Ikbip	IKBKB interacting protein	-0.617082	DOWNinPregLPSvsPregCtl	0.0801411
19660	Rbp2	retinol binding protein 2, cellular	1.24536	UPinPregLPSvsPregCtl	0.0802582
67731	Fbxo32	F-box protein 32	-0.777817	DOWNinPregLPSvsPregCtl	0.080852
68026	2810417H13Rik	RIKEN cDNA 2810417H13 gene	0.762408	UPinPregLPSvsPregCtl	0.0809103
19378	Aldh1a2	aldehyde dehydrogenase family 1, subfamily A2	0.868418	UPinPregLPSvsPregCtl	0.0811894
75533	Nme5	NME/NM23 family member 5	-0.646337	DOWNinPregLPSvsPregCtl	0.0812913
20775	Sqle	squalene epoxidase	0.928191	UPinPregLPSvsPregCtl	0.0815105
12263	C2	complement component 2 (within H-2S)	-1.28885	DOWNinPregLPSvsPregCtl	0.0818656
12509	Cd59a	CD59a antigen	-0.770639	DOWNinPregLPSvsPregCtl	0.0823508
11717	Ampd3	adenosine monophosphate deaminase 3	-0.849494	DOWNinPregLPSvsPregCtl	0.0823508
433016	Gm5483	predicted gene 5483	0.760562	UPinPregLPSvsPregCtl	0.0829405
19378	Aldh1a2	aldehyde dehydrogenase family 1, subfamily A2	0.59687	UPinPregLPSvsPregCtl	0.082952
53379	Hnrnpa2b1	heterogeneous nuclear ribonucleoprotein A2/B1	0.647215	UPinPregLPSvsPregCtl	0.0833498
67903	Gipc1	GIPC PDZ domain containing family, member 1	0.738377	UPinPregLPSvsPregCtl	0.0833498
360013	Myo18a	myosin XVIIIA	0.591372	UPinPregLPSvsPregCtl	0.0833498
56338	Txnip	thioredoxin interacting protein	-0.982282	DOWNinPregLPSvsPregCtl	0.0835516
77619	Prelid2	PRELI domain containing 2	1.00197	UPinPregLPSvsPregCtl	0.0835516
14687	Gnaz	guanine nucleotide binding protein, alpha z subunit	-0.592546	DOWNinPregLPSvsPregCtl	0.0840711
621603	Aldh3b2	aldehyde dehydrogenase 3 family, member B2	0.808619	UPinPregLPSvsPregCtl	0.084499
56744	Pf4	platelet factor 4	-0.626073	DOWNinPregLPSvsPregCtl	0.0848679
16176	Il1b	interleukin 1 beta	1.69758	UPinPregLPSvsPregCtl	0.0848679
20496	Slc12a2	solute carrier family 12, member 2	-1.15523	DOWNinPregLPSvsPregCtl	0.08495
16858	Lgals7	lectin, galactose binding, soluble 7	0.958543	UPinPregLPSvsPregCtl	0.0850333
246277	Csad	cysteine sulfinic acid decarboxylase	-0.596989	DOWNinPregLPSvsPregCtl	0.0852761
214531	Tmprss13	transmembrane protease, serine 13	0.978677	UPinPregLPSvsPregCtl	0.0854589
217430	Pqlc3	PQ loop repeat containing	1.04269	UPinPregLPSvsPregCtl	0.0856089
140795	P2ry14	purinergic receptor P2Y, G-protein coupled, 14	1.68805	UPinPregLPSvsPregCtl	0.0856806
83814	Nedd4l	neural precursor cell expressed, developmentally down-regulated gene 4-like	-0.614175	DOWNinPregLPSvsPregCtl	0.0863159
20129	Rptn	repetin	2.84905	UPinPregLPSvsPregCtl	0.0864093
20754	Sprr1b	small proline-rich protein 1B	3.03162	UPinPregLPSvsPregCtl	0.0867881
109082	Fbxw17	F-box and WD-40 domain protein 17	-0.634302	DOWNinPregLPSvsPregCtl	0.0868646
65963	Tmem176b	transmembrane protein 176B	-1.17562	DOWNinPregLPSvsPregCtl	0.0869491
347722	Agap1	ArfGAP with GTPase domain, ankyrin repeat and PH domain 1	-0.756564	DOWNinPregLPSvsPregCtl	0.0874945
69928	Apitd1	apoptosis-inducing, TAF9-like domain 1	0.586812	UPinPregLPSvsPregCtl	0.0875088
16447	Ivl	involucrin	1.71207	UPinPregLPSvsPregCtl	0.0875088
18391	Sigmar1	sigma non-opioid intracellular receptor 1	0.589921	UPinPregLPSvsPregCtl	0.0878558
110078	Pygb	brain glycogen phosphorylase	-0.858785	DOWNinPregLPSvsPregCtl	0.0878558
329416	Nostrin	nitric oxide synthase trafficker	0.701416	UPinPregLPSvsPregCtl	0.0885866
29876	Clic4	chloride intracellular channel 4 (mitochondrial)	-0.769658	DOWNinPregLPSvsPregCtl	0.0885866
18938	Ppp1r14b	protein phosphatase 1, regulatory (inhibitor) subunit 14B	0.596591	UPinPregLPSvsPregCtl	0.0890513
76580	Mib2	mindbomb homolog 2 (Drosophila)	-0.669087	DOWNinPregLPSvsPregCtl	0.0890513
104086	Cyp27a1	cytochrome P450, family 27, subfamily a, polypeptide 1	-0.814703	DOWNinPregLPSvsPregCtl	0.0895338
75234	Rnf19b	ring finger protein 19B	0.792786	UPinPregLPSvsPregCtl	0.0897106
319765	Igf2bp2	insulin-like growth factor 2 mRNA binding protein 2	-0.858166	DOWNinPregLPSvsPregCtl	0.0899199
69541	Lyg1	lysozyme G-like 1	2.34647	UPinPregLPSvsPregCtl	0.0899238
107995	Cdc20	cell division cycle 20	0.721862	UPinPregLPSvsPregCtl	0.0900835
67425	Eps8l1	EPS8-like 1	0.673804	UPinPregLPSvsPregCtl	0.0900835
215707	Ccdc92	coiled-coil domain containing 92	-0.628032	DOWNinPregLPSvsPregCtl	0.0909189
13723	Emb	embigin	-0.661294	DOWNinPregLPSvsPregCtl	0.0916458
270118	Maml2	mastermind like 2 (Drosophila)	-0.60161	DOWNinPregLPSvsPregCtl	0.0916679
18817	Plk1	polo-like kinase 1	0.605299	UPinPregLPSvsPregCtl	0.0916974
67921	Ube2f	ubiquitin-conjugating enzyme E2F (putative)	0.701094	UPinPregLPSvsPregCtl	0.0916974
78651	Lsm6	LSM6 homolog, U6 small nuclear RNA associated (S. cerevisiae)	0.681543	UPinPregLPSvsPregCtl	0.0923276
12545	Cdc7	cell division cycle 7 (S. cerevisiae)	-1.15614	DOWNinPregLPSvsPregCtl	0.0923276
20861	Stfa1	stefin A1	1.99877	UPinPregLPSvsPregCtl	0.0923993
93843	Pnck	pregnancy upregulated non-ubiquitously expressed CaM kinase	-0.624527	DOWNinPregLPSvsPregCtl	0.0923993
20887	Sult1a1	sulfotransferase family 1A, phenol-preferring, member 1	-1.47826	DOWNinPregLPSvsPregCtl	0.0932606
67155	Smarca2	SWI/SNF related, matrix associated, actin dependent regulator of chromatin, subfamily a, member 2	-0.688254	DOWNinPregLPSvsPregCtl	0.0932606
108155	Ogt	O-linked N-acetylglucosamine (GlcNAc) transferase (UDP-N-acetylglucosamine:polypeptide-N-acetylglucosaminyl transferase)	-0.634352	DOWNinPregLPSvsPregCtl	0.0932606
12111	Bgn	biglycan	-0.822586	DOWNinPregLPSvsPregCtl	0.0932606
76890	Memo1	mediator of cell motility 1	0.711373	UPinPregLPSvsPregCtl	0.0933456
69454	Clic3	chloride intracellular channel 3	1.45762	UPinPregLPSvsPregCtl	0.0933456
56460	Pkp3	plakophilin 3	1.09994	UPinPregLPSvsPregCtl	0.0933456
109222	Rarres1	retinoic acid receptor responder (tazarotene induced) 1	0.955737	UPinPregLPSvsPregCtl	0.0933456
67451	Pkp2	plakophilin 2	-0.612418	DOWNinPregLPSvsPregCtl	0.0939203
52331	Stbd1	starch binding domain 1	-0.7151	DOWNinPregLPSvsPregCtl	0.0951378
64657	Mrps10	mitochondrial ribosomal protein S10	0.627751	UPinPregLPSvsPregCtl	0.0953396
103743	Tmem98	transmembrane protein 98	-0.619985	DOWNinPregLPSvsPregCtl	0.0953396
72007	Fndc3b	fibronectin type III domain containing 3B	-0.694095	DOWNinPregLPSvsPregCtl	0.0960475
17898	Myl7	myosin, light polypeptide 7, regulatory	0.836508	UPinPregLPSvsPregCtl	0.0962639
56150	Mad2l1	MAD2 mitotic arrest deficient-like 1	0.699473	UPinPregLPSvsPregCtl	0.0963323
104681	Slc16a6	solute carrier family 16 (monocarboxylic acid transporters), member 6	0.90605	UPinPregLPSvsPregCtl	0.0963323
140474	Muc4	mucin 4	-0.889904	DOWNinPregLPSvsPregCtl	0.0974729
11989	Slc7a3	solute carrier family 7 (cationic amino acid transporter, y+ system), member 3	0.609269	UPinPregLPSvsPregCtl	0.0974729
70574	Cpm	carboxypeptidase M	-0.636521	DOWNinPregLPSvsPregCtl	0.0974729
12642	Ch25h	cholesterol 25-hydroxylase	0.60642	UPinPregLPSvsPregCtl	0.0983631
140474	Muc4	mucin 4	-0.845448	DOWNinPregLPSvsPregCtl	0.0994473
117198	Ivns1abp	influenza virus NS1A binding protein	-0.663384	DOWNinPregLPSvsPregCtl	0.0995047
