# Supplementary material for: Pregnancy-specific transcriptional changes upon endotoxin exposure in mice
Source: publisher site journal article supplement (doi:10.1515/jpm-2020-0159), 2020-08-31
Supplement: Supplementary file 2 [file j_jpm-2020-0159_suppl_004.xlsx]

## Sheet: ADRENAL_LPS_PregLPSvsPregCtl-No
ENTREZ	SYMBOL	Name	Log Fold Change	Direction	Adjusted p-value
24012	Rgs7	regulator of G protein signaling 7	-1.32887	DOWNinPregLPSvsPregCtl	1.96836e-06
217212	Pyy	peptide YY	-0.832103	DOWNinPregLPSvsPregCtl	3.35526e-06
17768	Mthfd2	methylenetetrahydrofolate dehydrogenase (NAD+ dependent), methenyltetrahydrofolate cyclohydrolase	0.636874	UPinPregLPSvsPregCtl	1.51112e-05
17768	Mthfd2	methylenetetrahydrofolate dehydrogenase (NAD+ dependent), methenyltetrahydrofolate cyclohydrolase	1.02072	UPinPregLPSvsPregCtl	2.574e-05
208715	Hmgcs1	3-hydroxy-3-methylglutaryl-Coenzyme A synthase 1	1.10503	UPinPregLPSvsPregCtl	3.18206e-05
110196	Fdps	farnesyl diphosphate synthetase	1.47082	UPinPregLPSvsPregCtl	3.18206e-05
19039	Lgals3bp	lectin, galactoside-binding, soluble, 3 binding protein	-0.858011	DOWNinPregLPSvsPregCtl	3.38333e-05
20731	Spink4	serine peptidase inhibitor, Kazal type 4	-1.18542	DOWNinPregLPSvsPregCtl	3.4288e-05
20775	Sqle	squalene epoxidase	1.45199	UPinPregLPSvsPregCtl	5.49401e-05
16164	Il13ra1	interleukin 13 receptor, alpha 1	-1.06425	DOWNinPregLPSvsPregCtl	8.80117e-05
12460	Ccs	copper chaperone for superoxide dismutase	-0.707076	DOWNinPregLPSvsPregCtl	0.000108654
216190	Appl2	adaptor protein, phosphotyrosine interaction, PH domain and leucine zipper containing 2	-1.45318	DOWNinPregLPSvsPregCtl	0.000188866
110196	Fdps	farnesyl diphosphate synthetase	1.50909	UPinPregLPSvsPregCtl	0.000313373
15186	Hdc	histidine decarboxylase	1.16678	UPinPregLPSvsPregCtl	0.000383575
13072	Cyp11b2	cytochrome P450, family 11, subfamily b, polypeptide 2	1.63762	UPinPregLPSvsPregCtl	0.000383575
23962	Oasl2	2'-5' oligoadenylate synthetase-like 2	-0.948246	DOWNinPregLPSvsPregCtl	0.000412279
13121	Cyp51	cytochrome P450, family 51	1.26009	UPinPregLPSvsPregCtl	0.000412279
20293	Ccl12	chemokine (C-C motif) ligand 12	1.30622	UPinPregLPSvsPregCtl	0.000474308
227154	Stradb	STE20-related kinase adaptor beta	-0.650692	DOWNinPregLPSvsPregCtl	0.000479224
18948	Pnmt	phenylethanolamine-N-methyltransferase	2.88311	UPinPregLPSvsPregCtl	0.000504067
15547	Trmt2a	TRM2 tRNA methyltransferase 2A	-0.619457	DOWNinPregLPSvsPregCtl	0.000695962
105298	Epdr1	ependymin related protein 1 (zebrafish)	-0.794028	DOWNinPregLPSvsPregCtl	0.000745064
243312	Elfn1	leucine rich repeat and fibronectin type III, extracellular 1	-1.35859	DOWNinPregLPSvsPregCtl	0.000745064
116748	Lsm10	U7 snRNP-specific Sm-like protein LSM10	-0.633161	DOWNinPregLPSvsPregCtl	0.000837697
213068	Tmem71	transmembrane protein 71	-0.794193	DOWNinPregLPSvsPregCtl	0.000837697
15040	H2-T23	histocompatibility 2, T region locus 23	-0.776169	DOWNinPregLPSvsPregCtl	0.000871314
15040	H2-T23	histocompatibility 2, T region locus 23	-0.831353	DOWNinPregLPSvsPregCtl	0.000948076
71956	Rnf135	ring finger protein 135	-0.780072	DOWNinPregLPSvsPregCtl	0.000948076
13072	Cyp11b2	cytochrome P450, family 11, subfamily b, polypeptide 2	1.63775	UPinPregLPSvsPregCtl	0.00106304
12862	Cox6a2	cytochrome c oxidase subunit VIa polypeptide 2	0.925798	UPinPregLPSvsPregCtl	0.00107323
207683	Igsf11	immunoglobulin superfamily, member 11	1.24321	UPinPregLPSvsPregCtl	0.00111067
27528	Nrep	neuronal regeneration related protein	-1.51374	DOWNinPregLPSvsPregCtl	0.00117306
170459	Stard4	StAR-related lipid transfer (START) domain containing 4	0.970682	UPinPregLPSvsPregCtl	0.00126736
19701	Ren1	renin 1 structural	-0.671603	DOWNinPregLPSvsPregCtl	0.0013975
69440	Dennd6b	DENN/MADD domain containing 6B	-0.826785	DOWNinPregLPSvsPregCtl	0.00139844
140795	P2ry14	purinergic receptor P2Y, G-protein coupled, 14	0.808101	UPinPregLPSvsPregCtl	0.0015232
107272	Psat1	phosphoserine aminotransferase 1	0.894844	UPinPregLPSvsPregCtl	0.00184844
207683	Igsf11	immunoglobulin superfamily, member 11	1.13694	UPinPregLPSvsPregCtl	0.0019252
246738	Dnajc28	DnaJ (Hsp40) homolog, subfamily C, member 28	-0.753168	DOWNinPregLPSvsPregCtl	0.00192795
15959	Ifit3	interferon-induced protein with tetratricopeptide repeats 3	-1.3998	DOWNinPregLPSvsPregCtl	0.00221009
13590	Lefty1	left right determination factor 1	-0.819832	DOWNinPregLPSvsPregCtl	0.00225583
327959	Xaf1	XIAP associated factor 1	-0.981411	DOWNinPregLPSvsPregCtl	0.00236586
11988	Slc7a2	solute carrier family 7 (cationic amino acid transporter, y+ system), member 2	0.756842	UPinPregLPSvsPregCtl	0.00284585
245386	Tmem255a	transmembrane protein 255A	-0.832225	DOWNinPregLPSvsPregCtl	0.00311336
56632	Sphk2	sphingosine kinase 2	0.651152	UPinPregLPSvsPregCtl	0.00322311
106639	Vmac	vimentin-type intermediate filament associated coiled-coil protein	-0.607863	DOWNinPregLPSvsPregCtl	0.00327405
20308	Ccl9	chemokine (C-C motif) ligand 9	1.48242	UPinPregLPSvsPregCtl	0.00341586
66082	Abhd6	abhydrolase domain containing 6	-0.758496	DOWNinPregLPSvsPregCtl	0.00341586
20293	Ccl12	chemokine (C-C motif) ligand 12	1.02458	UPinPregLPSvsPregCtl	0.00379418
14964	H2-D1	histocompatibility 2, D region locus 1	-0.679982	DOWNinPregLPSvsPregCtl	0.00450135
56632	Sphk2	sphingosine kinase 2	0.65261	UPinPregLPSvsPregCtl	0.00527764
13823	Epb4.1l3	erythrocyte protein band 4.1-like 3	-0.843875	DOWNinPregLPSvsPregCtl	0.00534168
13808	Eno3	enolase 3, beta muscle	0.734963	UPinPregLPSvsPregCtl	0.00662704
338521	Fa2h	fatty acid 2-hydroxylase	1.13727	UPinPregLPSvsPregCtl	0.00672688
69519	Rwdd2a	RWD domain containing 2A	-0.665806	DOWNinPregLPSvsPregCtl	0.00693154
66082	Abhd6	abhydrolase domain containing 6	-0.994455	DOWNinPregLPSvsPregCtl	0.00709385
15040	H2-T23	histocompatibility 2, T region locus 23	-0.776206	DOWNinPregLPSvsPregCtl	0.00782133
20821	Trim21	tripartite motif-containing 21	-0.631223	DOWNinPregLPSvsPregCtl	0.00799709
116838	Rims2	regulating synaptic membrane exocytosis 2	0.861058	UPinPregLPSvsPregCtl	0.00822308
54710	Hs3st3b1	heparan sulfate (glucosamine) 3-O-sulfotransferase 3B1	-0.856311	DOWNinPregLPSvsPregCtl	0.00839148
68774	Ms4a6d	membrane-spanning 4-domains, subfamily A, member 6D	0.642617	UPinPregLPSvsPregCtl	0.00839148
235047	Zfp809	zinc finger protein 809	-0.678195	DOWNinPregLPSvsPregCtl	0.00876191
11539	Adora1	adenosine A1 receptor	0.658861	UPinPregLPSvsPregCtl	0.00890108
223672	Apol9a	apolipoprotein L 9a	-0.794054	DOWNinPregLPSvsPregCtl	0.00890108
320204	Mettl20	methyltransferase like 20	-0.623227	DOWNinPregLPSvsPregCtl	0.0095226
15186	Hdc	histidine decarboxylase	1.10924	UPinPregLPSvsPregCtl	0.00958662
20847	Stat2	signal transducer and activator of transcription 2	-0.684276	DOWNinPregLPSvsPregCtl	0.0101927
20715	Serpina3g	serine (or cysteine) peptidase inhibitor, clade A, member 3G	-1.67706	DOWNinPregLPSvsPregCtl	0.0104142
11475	Acta2	actin, alpha 2, smooth muscle, aorta	1.25544	UPinPregLPSvsPregCtl	0.011706
14964	H2-D1	histocompatibility 2, D region locus 1	-0.603962	DOWNinPregLPSvsPregCtl	0.0120253
69101	Ydjc	YdjC homolog (bacterial)	-0.716241	DOWNinPregLPSvsPregCtl	0.0124818
11475	Acta2	actin, alpha 2, smooth muscle, aorta	1.43974	UPinPregLPSvsPregCtl	0.0125616
69861	2010003K11Rik	RIKEN cDNA 2010003K11 gene	0.959322	UPinPregLPSvsPregCtl	0.0125616
53945	Slc40a1	solute carrier family 40 (iron-regulated transporter), member 1	-1.11722	DOWNinPregLPSvsPregCtl	0.0127123
11604	Agrp	agouti related neuropeptide	1.17109	UPinPregLPSvsPregCtl	0.0134992
19171	Psmb10	proteasome (prosome, macropain) subunit, beta type 10	-0.815468	DOWNinPregLPSvsPregCtl	0.0151206
213603	Slc44a3	solute carrier family 44, member 3	-0.612455	DOWNinPregLPSvsPregCtl	0.0155378
71687	Tmem25	transmembrane protein 25	-0.781929	DOWNinPregLPSvsPregCtl	0.0156001
319269	A130040M12Rik	RIKEN cDNA A130040M12 gene	0.880111	UPinPregLPSvsPregCtl	0.0156001
63913	Fam129a	family with sequence similarity 129, member A	0.781531	UPinPregLPSvsPregCtl	0.0161616
19171	Psmb10	proteasome (prosome, macropain) subunit, beta type 10	-0.810196	DOWNinPregLPSvsPregCtl	0.0164415
24110	Usp18	ubiquitin specific peptidase 18	-0.707552	DOWNinPregLPSvsPregCtl	0.0164415
16913	Psmb8	proteasome (prosome, macropain) subunit, beta type 8 (large multifunctional peptidase 7)	-0.88431	DOWNinPregLPSvsPregCtl	0.0166957
12959	Cryba4	crystallin, beta A4	0.85006	UPinPregLPSvsPregCtl	0.0176056
11988	Slc7a2	solute carrier family 7 (cationic amino acid transporter, y+ system), member 2	1.02168	UPinPregLPSvsPregCtl	0.0179169
16913	Psmb8	proteasome (prosome, macropain) subunit, beta type 8 (large multifunctional peptidase 7)	-0.838644	DOWNinPregLPSvsPregCtl	0.0181038
209387	Trim30d	tripartite motif-containing 30D	-0.614602	DOWNinPregLPSvsPregCtl	0.0189083
72386	2610035D17Rik	RIKEN cDNA 2610035D17 gene	-0.713894	DOWNinPregLPSvsPregCtl	0.0193752
103743	Tmem98	transmembrane protein 98	-0.684324	DOWNinPregLPSvsPregCtl	0.020872
14964	H2-D1	histocompatibility 2, D region locus 1	-0.63307	DOWNinPregLPSvsPregCtl	0.020872
17858	Mx2	MX dynamin-like GTPase 2	-0.610011	DOWNinPregLPSvsPregCtl	0.020872
21345	Tagln	transgelin	0.59386	UPinPregLPSvsPregCtl	0.0216702
235135	Tmem45b	transmembrane protein 45b	2.11834	UPinPregLPSvsPregCtl	0.0225493
13132	Dab2	disabled 2, mitogen-responsive phosphoprotein	0.641326	UPinPregLPSvsPregCtl	0.0230238
69202	Ptms	parathymosin	-0.616282	DOWNinPregLPSvsPregCtl	0.0236378
108897	Aif1l	allograft inflammatory factor 1-like	-0.942979	DOWNinPregLPSvsPregCtl	0.0236378
26950	Vsnl1	visinin-like 1	0.821976	UPinPregLPSvsPregCtl	0.0238614
68728	Trp53inp2	transformation related protein 53 inducible nuclear protein 2	0.69387	UPinPregLPSvsPregCtl	0.0238614
66234	Msmo1	methylsterol monoxygenase 1	0.897184	UPinPregLPSvsPregCtl	0.0238614
75686	Nudt16	nudix (nucleoside diphosphate linked moiety X)-type motif 16	-0.656317	DOWNinPregLPSvsPregCtl	0.0243509
63913	Fam129a	family with sequence similarity 129, member A	0.783631	UPinPregLPSvsPregCtl	0.0274004
216505	Pik3ip1	phosphoinositide-3-kinase interacting protein 1	-0.614515	DOWNinPregLPSvsPregCtl	0.0279781
27279	Tnfrsf12a	tumor necrosis factor receptor superfamily, member 12a	0.972692	UPinPregLPSvsPregCtl	0.0312928
140795	P2ry14	purinergic receptor P2Y, G-protein coupled, 14	0.605064	UPinPregLPSvsPregCtl	0.03131
107589	Mylk	myosin, light polypeptide kinase	1.1587	UPinPregLPSvsPregCtl	0.0315167
229900	Gbp7	guanylate binding protein 7	-0.971304	DOWNinPregLPSvsPregCtl	0.0323542
16912	Psmb9	proteasome (prosome, macropain) subunit, beta type 9 (large multifunctional peptidase 2)	-0.743568	DOWNinPregLPSvsPregCtl	0.0339271
26897	Acot1	acyl-CoA thioesterase 1	-1.06398	DOWNinPregLPSvsPregCtl	0.0344172
20667	Sox12	SRY (sex determining region Y)-box 12	-0.606371	DOWNinPregLPSvsPregCtl	0.0347446
20307	Ccl8	chemokine (C-C motif) ligand 8	1.20378	UPinPregLPSvsPregCtl	0.03677
56338	Txnip	thioredoxin interacting protein	-0.750311	DOWNinPregLPSvsPregCtl	0.0368488
20775	Sqle	squalene epoxidase	0.712336	UPinPregLPSvsPregCtl	0.0368488
13132	Dab2	disabled 2, mitogen-responsive phosphoprotein	0.604597	UPinPregLPSvsPregCtl	0.0371591
15901	Id1	inhibitor of DNA binding 1	0.618247	UPinPregLPSvsPregCtl	0.0393366
75731	Idnk	idnK gluconokinase homolog (E. coli)	-0.720506	DOWNinPregLPSvsPregCtl	0.0398625
17476	Mpeg1	macrophage expressed gene 1	-1.30739	DOWNinPregLPSvsPregCtl	0.0404461
17349	Mlf1	myeloid leukemia factor 1	1.09571	UPinPregLPSvsPregCtl	0.0404461
11475	Acta2	actin, alpha 2, smooth muscle, aorta	0.926095	UPinPregLPSvsPregCtl	0.0409681
23960	Oas1g	2'-5' oligoadenylate synthetase 1G	-0.873412	DOWNinPregLPSvsPregCtl	0.0414793
103743	Tmem98	transmembrane protein 98	-0.602765	DOWNinPregLPSvsPregCtl	0.0430833
16176	Il1b	interleukin 1 beta	-0.730656	DOWNinPregLPSvsPregCtl	0.0430833
226970	Arhgef4	Rho guanine nucleotide exchange factor (GEF) 4	-0.60273	DOWNinPregLPSvsPregCtl	0.046357
70861	Akr1cl	aldo-keto reductase family 1, member C-like	-1.14281	DOWNinPregLPSvsPregCtl	0.0481354
56089	Ramp3	receptor (calcitonin) activity modifying protein 3	-0.698	DOWNinPregLPSvsPregCtl	0.0481354
24110	Usp18	ubiquitin specific peptidase 18	-0.661896	DOWNinPregLPSvsPregCtl	0.0501056
99887	Tmem56	transmembrane protein 56	0.592338	UPinPregLPSvsPregCtl	0.0501573
20496	Slc12a2	solute carrier family 12, member 2	0.750835	UPinPregLPSvsPregCtl	0.0516745
13479	Dpep1	dipeptidase 1 (renal)	0.628593	UPinPregLPSvsPregCtl	0.0532706
20525	Slc2a1	solute carrier family 2 (facilitated glucose transporter), member 1	0.645244	UPinPregLPSvsPregCtl	0.0533985
11475	Acta2	actin, alpha 2, smooth muscle, aorta	0.792776	UPinPregLPSvsPregCtl	0.0534362
216188	Aldh1l2	aldehyde dehydrogenase 1 family, member L2	0.683669	UPinPregLPSvsPregCtl	0.0534486
26912	Gcat	glycine C-acetyltransferase (2-amino-3-ketobutyrate-coenzyme A ligase)	0.686256	UPinPregLPSvsPregCtl	0.0548264
12505	Cd44	CD44 antigen	0.60022	UPinPregLPSvsPregCtl	0.0575671
209200	Dtx3l	deltex 3-like (Drosophila)	-0.614098	DOWNinPregLPSvsPregCtl	0.060078
381319	Batf3	basic leucine zipper transcription factor, ATF-like 3	-0.627745	DOWNinPregLPSvsPregCtl	0.0605459
72747	Ttc39c	tetratricopeptide repeat domain 39C	0.631112	UPinPregLPSvsPregCtl	0.0607615
13982	Esr1	estrogen receptor 1 (alpha)	-0.829157	DOWNinPregLPSvsPregCtl	0.0607615
214639	4930486L24Rik	RIKEN cDNA 4930486L24 gene	0.892859	UPinPregLPSvsPregCtl	0.0638866
27222	Atp1a4	ATPase, Na+/K+ transporting, alpha 4 polypeptide	1.04618	UPinPregLPSvsPregCtl	0.064057
15277	Hk2	hexokinase 2	1.06423	UPinPregLPSvsPregCtl	0.064401
74153	Uba7	ubiquitin-like modifier activating enzyme 7	-0.658506	DOWNinPregLPSvsPregCtl	0.0656354
15959	Ifit3	interferon-induced protein with tetratricopeptide repeats 3	-1.01616	DOWNinPregLPSvsPregCtl	0.066371
107589	Mylk	myosin, light polypeptide kinase	0.899953	UPinPregLPSvsPregCtl	0.0679143
18383	Tnfrsf11b	tumor necrosis factor receptor superfamily, member 11b (osteoprotegerin)	0.805892	UPinPregLPSvsPregCtl	0.0714818
13618	Ednrb	endothelin receptor type B	0.592502	UPinPregLPSvsPregCtl	0.0717292
23960	Oas1g	2'-5' oligoadenylate synthetase 1G	-0.761513	DOWNinPregLPSvsPregCtl	0.073604
245386	Tmem255a	transmembrane protein 255A	-0.750145	DOWNinPregLPSvsPregCtl	0.0736554
74183	Perm1	PPARGC1 and ESRR induced regulator, muscle 1	0.600714	UPinPregLPSvsPregCtl	0.0739674
233079	Ffar2	free fatty acid receptor 2	1.17205	UPinPregLPSvsPregCtl	0.0744082
214444	Cdk5rap2	CDK5 regulatory subunit associated protein 2	-0.912413	DOWNinPregLPSvsPregCtl	0.0747977
14219	Ctgf	connective tissue growth factor	0.786764	UPinPregLPSvsPregCtl	0.0846676
13007	Csrp1	cysteine and glycine-rich protein 1	0.69906	UPinPregLPSvsPregCtl	0.0861912
93761	Smarca1	SWI/SNF related, matrix associated, actin dependent regulator of chromatin, subfamily a, member 1	-0.625751	DOWNinPregLPSvsPregCtl	0.0864225
433016	Gm5483	predicted gene 5483	0.926099	UPinPregLPSvsPregCtl	0.0874484
12457	Ccrn4l	CCR4 carbon catabolite repression 4-like (S. cerevisiae)	0.678865	UPinPregLPSvsPregCtl	0.0875558
107589	Mylk	myosin, light polypeptide kinase	1.05755	UPinPregLPSvsPregCtl	0.0883063
56089	Ramp3	receptor (calcitonin) activity modifying protein 3	-0.697224	DOWNinPregLPSvsPregCtl	0.0886828
98932	Myl9	myosin, light polypeptide 9, regulatory	0.902227	UPinPregLPSvsPregCtl	0.0889811
229900	Gbp7	guanylate binding protein 7	-0.640485	DOWNinPregLPSvsPregCtl	0.0896662
12916	Crem	cAMP responsive element modulator	1.01827	UPinPregLPSvsPregCtl	0.0910964
14718	Got1	glutamic-oxaloacetic transaminase 1, soluble	0.871779	UPinPregLPSvsPregCtl	0.0916519
20304	Ccl5	chemokine (C-C motif) ligand 5	0.718924	UPinPregLPSvsPregCtl	0.0924694
22169	Cmpk2	cytidine monophosphate (UMP-CMP) kinase 2, mitochondrial	-0.611549	DOWNinPregLPSvsPregCtl	0.0943915
17067	Ly6c1	lymphocyte antigen 6 complex, locus C1	-0.774387	DOWNinPregLPSvsPregCtl	0.0954651
20846	Stat1	signal transducer and activator of transcription 1	-0.618055	DOWNinPregLPSvsPregCtl	0.0960824
98932	Myl9	myosin, light polypeptide 9, regulatory	0.657814	UPinPregLPSvsPregCtl	0.0968456
56791	Ube2l6	ubiquitin-conjugating enzyme E2L 6	-0.68348	DOWNinPregLPSvsPregCtl	0.0986032
